# Supplementary material for: 1H NMR-Based Chemometrics to Gain Insights Into the Bran of Radiation-Induced Colored Wheat Mutant
Source: PubMed Central journal article supplement (PMC8764193; doi:10.3389/fnut.2021.806744), 2022-01-04
Supplement: Data_Sheet_1.pdf [file Data_Sheet_1.pdf]

## *Supplementary material*

# **$^1\text{H}$ NMR-Based Chemometrics to Gain Insights into the Bran of Radiation-Induced Colored Wheat Mutant**

***Yun-Seo Kil<sup>1</sup>, Ah-Reum Han<sup>2</sup>, Min-Jeong Hong<sup>2</sup>, Jin-Baek Kim<sup>2</sup>, Pil-Hoon Park<sup>1,3</sup>, Hyukjae Choi<sup>1,3</sup>,  
Joo-Won Nam<sup>1\*</sup>***

*<sup>1</sup>College of Pharmacy, Yeungnam University, Gyeongsan-si, Gyeongsangbuk-do, South Korea, <sup>2</sup>Advanced Radiation Technology Institute, Korea Atomic Energy Research Institute, Jeongeup-si, Jeollabuk-do, South Korea, <sup>3</sup>Research Institute of Cell Culture, Yeungnam University, Gyeongsan-si, Gyeongsangbuk-do, South Korea*

***\*Correspondence: Joo-Won Nam***  
*jwnam@yu.ac.kr*

## Table of Contents

|                           |                                                                                                                                                                                                                                                          |     |
|---------------------------|----------------------------------------------------------------------------------------------------------------------------------------------------------------------------------------------------------------------------------------------------------|-----|
| <b>Figure 1.</b>          | Preliminary data of <b>PWBr18</b> : (A) comparison of HPLC analysis data under detection of ELSD and PDA (254 nm), and (B) comparison of $^1\text{H}$ NMR spectra in $\text{D}_2\text{O}$ and $\text{CD}_3\text{OD}$ .....                               | S3  |
| <b>Figure 2.</b>          | $^1\text{H}$ NMR ( $\text{D}_2\text{O}$ ) spectra of 40 wheat bran samples .....                                                                                                                                                                         | S4  |
| <b>Table 1.</b>           | $^1\text{H}$ and $^{13}\text{C}$ NMR data of the identified metabolites with observed $^1\text{H}$ - $^1\text{H}$ COSY and $^1\text{H}$ - $^{13}\text{C}$ HMBC correlations in three representatives, <b>PWB</b> , <b>PWBr3</b> , or <b>PWBr19</b> ..... | S5  |
| <b>Table 2.</b>           | BMRD codes of the identified metabolites.....                                                                                                                                                                                                            | S15 |
| <b>Figure 3.</b>          | Detailed 2D NMR ( $\text{D}_2\text{O}$ ) data analysis of arabinitol (Ara) in <b>PWB</b> .....                                                                                                                                                           | S16 |
| <b>Figure 4.</b>          | Detailed 2D NMR ( $\text{D}_2\text{O}$ ) data analysis of glycerol (Glo) in <b>PWB</b> .....                                                                                                                                                             | S17 |
| <b>Figure 5.</b>          | Detailed 2D NMR ( $\text{D}_2\text{O}$ ) data analysis of mannitol (Man) in <b>PWB</b> .....                                                                                                                                                             | S18 |
| <b>Figure 6.</b>          | $^{13}\text{C}$ NMR data ( $\text{D}_2\text{O}$ ) of <b>PWBr3</b> with BMRD reference data of fructose and glucose.....                                                                                                                                  | S19 |
| <b>Figure 7.</b>          | Stacked $^1\text{H}$ NMR ( $\text{D}_2\text{O}$ ) spectra in an expansion for malate (MA) signals.....                                                                                                                                                   | S20 |
| <b>Figure 8.</b>          | Detailed 2D NMR ( $\text{D}_2\text{O}$ ) data analysis of malate (MA) in <b>PWB</b> .....                                                                                                                                                                | S21 |
| <b>Figure 9.</b>          | Key $^1\text{H}$ - $^1\text{H}$ COSY ( $\text{D}_2\text{O}$ ) correlations of malate in <b>PWB</b> , <b>PWBr14</b> , and <b>PWBr19</b> .....                                                                                                             | S22 |
| <b>Figure 10.</b>         | Spiking $^1\text{H}$ NMR experiments ( $\text{D}_2\text{O}$ ) with commercial standards of azelate and sebacate.....                                                                                                                                     | S23 |
| <b>Figure 11.</b>         | Detailed 2D NMR ( $\text{D}_2\text{O}$ ) data analysis of betaine (Bt) in <b>PWB</b> .....                                                                                                                                                               | S24 |
| <b>Figure 12.</b>         | Detailed 2D NMR ( $\text{D}_2\text{O}$ ) data analysis of choline sulfate (CS) in <b>PWB</b> .....                                                                                                                                                       | S25 |
| <b>Figure 13.</b>         | Detailed 2D NMR ( $\text{D}_2\text{O}$ ) data analysis of choline (Cho) in <b>PWB</b> .....                                                                                                                                                              | S26 |
| <b>Figure 14.</b>         | Preparation of the custom compound library for choline sulfate.....                                                                                                                                                                                      | S27 |
| <b>Figure 15.</b>         | Key $^1\text{H}$ - $^1\text{H}$ COSY ( $\text{D}_2\text{O}$ ) correlations for identification of (A) lactate (LA) and threonine (Thr), and (B) valine (Val), leucine (Leu), and isoleucine (Ile) in <b>PWB</b> .....                                     | S28 |
| <b>Table 3.</b>           | Concentrations (mg/g dried extract) of the identified metabolites of the wheat bran samples.....                                                                                                                                                         | S29 |
| <b>Figure 16.</b>         | Subtraction plots of (A) <b>PWB</b> with <b>YWB1</b> or <b>YWB2</b> , and (B) <b>PWBr6</b> with <b>PWB</b> , <b>YWB1</b> , or <b>YWB2</b> .....                                                                                                          | S30 |
| <hr/>                     |                                                                                                                                                                                                                                                          |     |
| <b>Spectroscopic Data</b> |                                                                                                                                                                                                                                                          |     |
| <b>Figures 17-20.</b>     | 1D and 2D NMR data ( $\text{D}_2\text{O}$ ) of <b>PWB</b> .....                                                                                                                                                                                          | S31 |
| <b>Figures 21-24.</b>     | 1D and 2D NMR data ( $\text{D}_2\text{O}$ ) of <b>PWBr3</b> .....                                                                                                                                                                                        | S35 |
| <b>Figures 25-28.</b>     | 1D and 2D NMR data ( $\text{D}_2\text{O}$ ) of <b>PWBr19</b> .....                                                                                                                                                                                       | S39 |
| <b>Figures 29-33.</b>     | 1D and 2D NMR data ( $\text{D}_2\text{O}$ ) of choline sulfate (CS) .....                                                                                                                                                                                | S43 |

**(A)**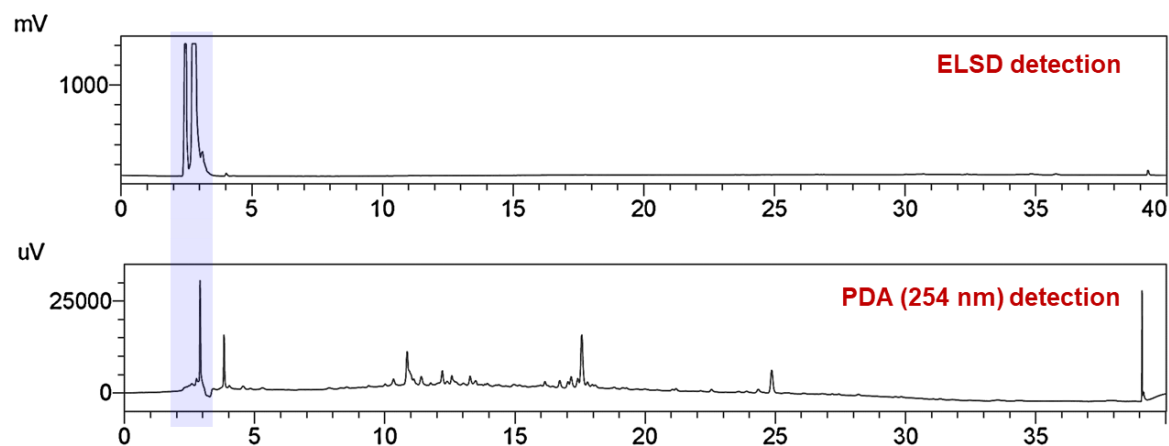

**Instrument:** Shimadzu HPLC-PDA  
Alltech ELSD  
**Column:** Luna C18, 5  $\mu$ m, 250  $\times$  4.6 mm  
**Flowrate:** 1 mL/min  
**Solvent system:**

A: H<sub>2</sub>O with 0.1% HCOOH  
B: CH<sub>3</sub>CN

| Time  | B Conc. (%) |
|-------|-------------|
| 0.01  | 10          |
| 1.00  | 10          |
| 26.00 | 100         |
| 34.00 | 100         |
| 34.01 | 10          |
| 40.00 | 10          |

**Sample concentration:** 2 mg/mL  
**Injection volume:** 10  $\mu$ L

**(B)**

1D NOESY presat NMR (600 MHz, D<sub>2</sub>O)

1D NOESY presat NMR (600 MHz, CD<sub>3</sub>OD)

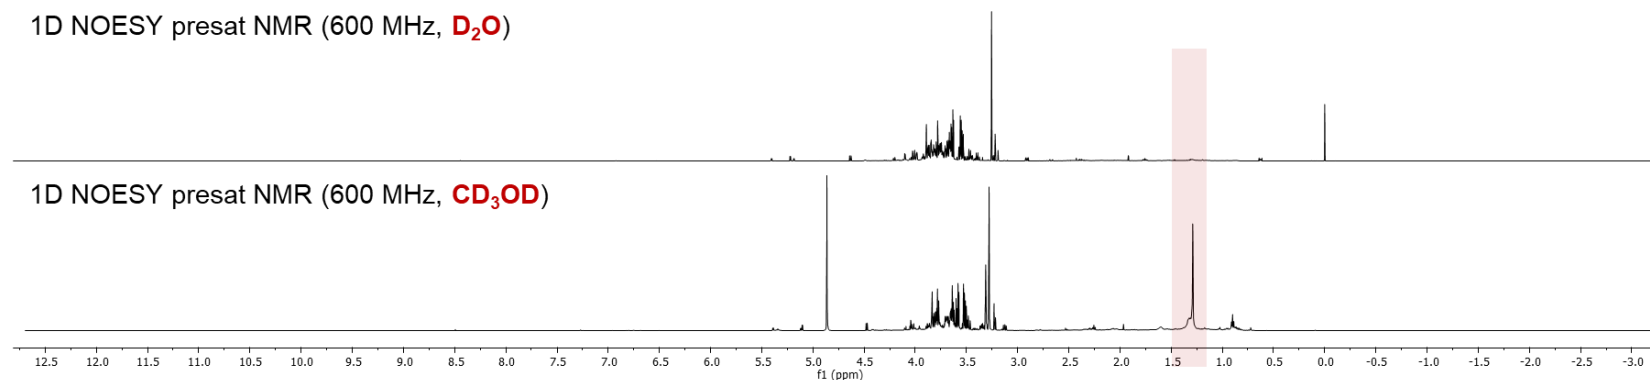

**Supplementary Figure 1.** Preliminary data of **PWBr18**: (A) comparison of HPLC analysis data under detection of ELSD and PDA (254 nm), and (B) comparison of <sup>1</sup>H NMR (600 MHz) spectra in D<sub>2</sub>O and CD<sub>3</sub>OD.

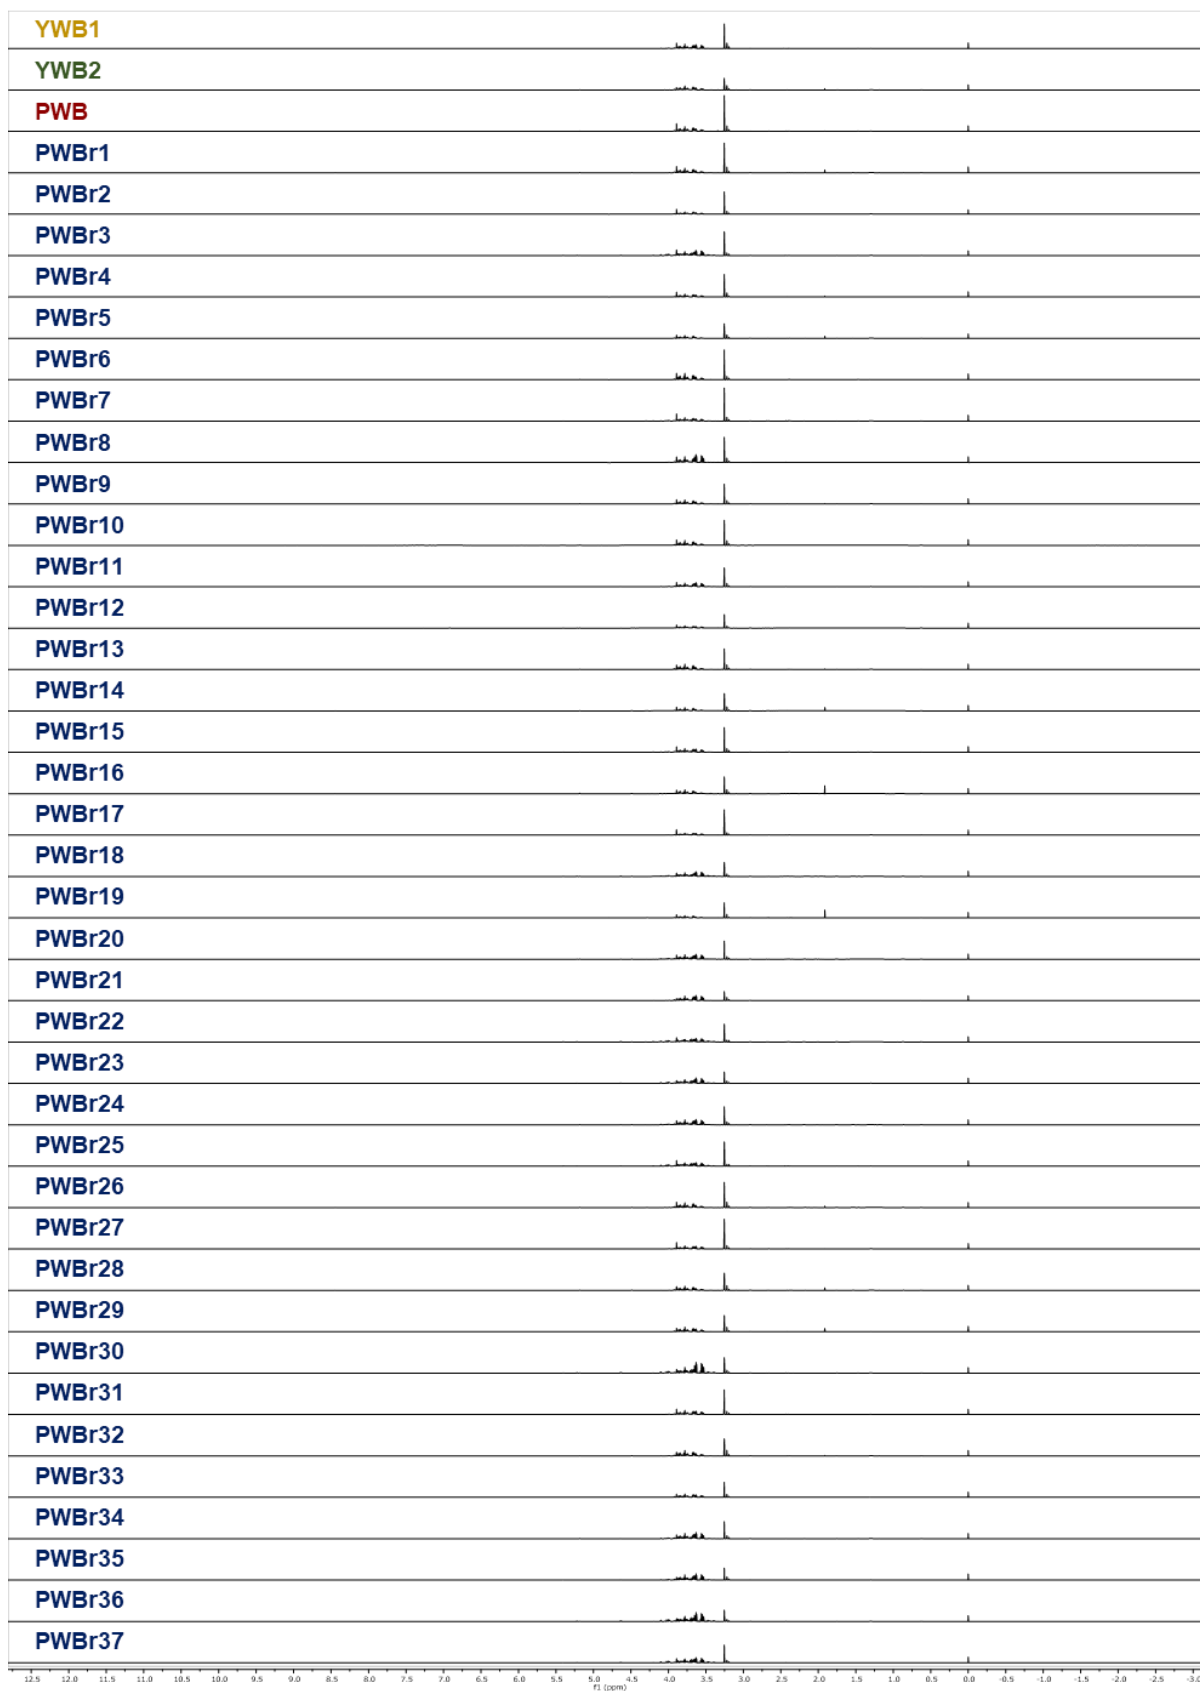

**Supplementary Figure 2.** <sup>1</sup>H NMR (600 MHz, D<sub>2</sub>O) spectra of 40 wheat bran samples (1D NOESY presat pulse sequence with  $\delta_H$  4.70 of a presaturation frequency for water suppression)

**Supplementary Table 1.**  $^1\text{H}$  (600 MHz) and  $^{13}\text{C}$  NMR (150 MHz) data of the identified metabolites with  $^1\text{H}$ - $^1\text{H}$  COSY (**blue bold**) and  $^1\text{H}$ - $^{13}\text{C}$  HMBC ( $\rightarrow$ ) correlations in three representatives, **PWB**, **PWBr3**, or **PWBr19**.

**(NOTE)** This table includes the assignments of  $^1\text{H}$  and  $^{13}\text{C}$  NMR resonances supported by 2D NMR correlations, with aids of the BMRD NMR data base. The  $^1\text{H}$  NMR peak assignments, performed only by the peak shape-based assessment using compound information from the Chenomx-embedded library (i.e. no sufficient evidences from 2D NMR correlation), were labeled “LB” in a meaning of “library based”. The  $^{13}\text{C}$  NMR assignment was still given when the  $^{13}\text{C}$  NMR signal was significantly detectable in the  $^{13}\text{C}$  NMR data of the extract samples and unambiguous assignment was allowed in comparison with the BMRD reference or previously reported data. “ND” (not determined) indicates the case where the  $^{13}\text{C}$  NMR signal was not determined due to low signal intensity or signal overlap. The 2D NMR correlations with substantial signal overlap, were not included due to uncertainty in the assignment.

| metabolite (ID)                                                                                                | position | $\delta_{\text{H}}$ , mult ( $J$ in Hz)              | $\delta_{\text{C}}$ | COSY<br>( <b>blue bold</b> ) | HMBC<br>(H $\rightarrow$ C) | Reference<br>sample code | MW (Da) |
|----------------------------------------------------------------------------------------------------------------|----------|------------------------------------------------------|---------------------|------------------------------|-----------------------------|--------------------------|---------|
| 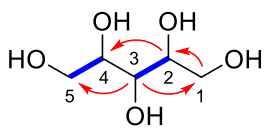<br>arabinitol ( <b>Ara</b> ) | 1        | 3.83, dd (12.0, 3.0), Ha<br>3.65 <sup>a</sup> , Hb   | 65.7                | Ha/Hb                        | 2                           | <b>PWB</b>               | 152.15  |
|                                                                                                                | 2        | 3.74 <sup>a</sup>                                    | 73.6                | 3                            | 1, 3, 4                     |                          |         |
|                                                                                                                | 3        | 3.56, dd (8.4, 2.2)                                  | 73.2                | 2                            | 1, 2, 4, 5                  |                          |         |
|                                                                                                                | 4        | 3.92, ddd (7.4, 5.5, 2.2)                            | 73.0                | 5                            | 5                           |                          |         |
|                                                                                                                | 5        | 3.66 <sup>a</sup>                                    | 65.8                | 4                            |                             |                          |         |
| <br>glycerol ( <b>Glo</b> )   | 1        | 3.64, dd (11.6, 4.7), Ha<br>3.55, dd (11.6, 6.5), Hb | 65.2                | Ha/Hb                        | 2, 3                        | <b>PWB</b>               | 104.17  |
|                                                                                                                | 2        | 3.77 <sup>a</sup>                                    | 74.8                |                              |                             |                          |         |
|                                                                                                                | 3        | 3.64, dd (11.6, 4.7), Ha<br>3.55, dd (11.6, 6.5), Hb | 65.2                | Ha/Hb                        | 1, 2                        |                          |         |
| <br>mannitol ( <b>Man</b> ) | 1        | 3.86, dd (11.8, 2.8), Ha<br>3.66, dd (11.8, 6.2), Hb | 65.9                | Ha/Hb                        | 2, 3                        | <b>PWB</b>               | 182.17  |
|                                                                                                                | 2        | 3.75, ddd (8.5, 6.2, 2.8)                            | 73.5                |                              | 1, 4                        |                          |         |
|                                                                                                                | 3        | 3.79, d (8.5)                                        | 72.0                |                              | 1, 4, 5                     |                          |         |
|                                                                                                                | 4        | 3.79, d (8.5)                                        | 72.0                |                              | 2, 3, 6                     |                          |         |
|                                                                                                                | 5        | 3.75, ddd (8.5, 6.2, 2.8)                            | 73.5                |                              | 3, 6                        |                          |         |
|                                                                                                                | 6        | 3.86, dd (11.8, 2.8), Ha<br>3.66, dd (11.8, 6.2), Hb | 65.9                | Ha/Hb                        | 4, 5                        |                          |         |

<sup>a</sup>Multiplicity was not determined due to signal overlap.

(Supplementary Table 1. continued)

| metabolite (ID)                                                                                              | position          | $\delta_H$ , mult ( $J$ in Hz)                       | $\delta_C$ | COSY<br>(blue bold) | HMBC<br>(H $\rightarrow$ C) | Reference<br>sample code | MW (Da) |  |
|--------------------------------------------------------------------------------------------------------------|-------------------|------------------------------------------------------|------------|---------------------|-----------------------------|--------------------------|---------|--|
| <b>Sugars</b>                                                                                                |                   |                                                      |            |                     |                             |                          |         |  |
| <b>fructose (Frc)</b>                                                                                        |                   |                                                      |            |                     |                             |                          |         |  |
| 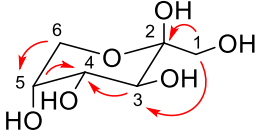<br>$\beta$ -fructopyranose | 1                 | 3.70, d (11.8), Ha<br>3.55, d (11.8), Hb             | 66.6       | Ha/Hb               | 2, 3                        | <b>PWBr3</b>             | 180.16  |  |
|                                                                                                              | 2                 |                                                      | 100.8      |                     |                             |                          |         |  |
|                                                                                                              | 3                 | 3.78, d (10.0)                                       | 70.3       |                     |                             |                          |         |  |
|                                                                                                              | 4                 | 3.88, dd (10.0, 3.5)                                 | 72.4       |                     | 3                           |                          |         |  |
|                                                                                                              | 5                 | 3.98, dt (3.5, 1.3)                                  | 71.9       |                     | 3, 4, 6                     |                          |         |  |
|                                                                                                              | 6                 | 4.01, dd (12.7, 1.3), Ha<br>3.69, dd (12.7, 1.3), Hb | 66.1       | Ha/Hb               | 2, 5                        |                          |         |  |
| <hr/>                                                                                                        |                   |                                                      |            |                     |                             |                          |         |  |
| <br>$\beta$ -fructofuranose | 1                 | 3.58, d (12.1), Ha<br>3.54 <sup>a</sup> , Hb         | 65.4       |                     | 2, 3                        |                          |         |  |
|                                                                                                              | 2                 |                                                      | 104.2      |                     |                             |                          |         |  |
|                                                                                                              | 3                 | 4.10 <sup>a</sup>                                    | 78.1       |                     | 4                           |                          |         |  |
|                                                                                                              | 4                 | 4.10 <sup>a</sup>                                    | 77.2       |                     | 3                           |                          |         |  |
|                                                                                                              | 5                 | 3.82 <sup>a</sup>                                    | 83.4       |                     | 4                           |                          |         |  |
|                                                                                                              | 6                 | 3.80 <sup>a</sup> , Ha<br>3.66 <sup>a</sup> , Hb     | 65.1       |                     | 5 (only from Hb)            |                          |         |  |
| <hr/>                                                                                                        |                   |                                                      |            |                     |                             |                          |         |  |
| <br><b>sucrose (Suc)</b>   | <b>Glc</b>        |                                                      |            |                     |                             |                          |         |  |
|                                                                                                              | 1                 | 5.40, d (3.9)                                        | 94.9       | 2                   | 3, 5, 2'                    |                          |         |  |
|                                                                                                              | 2                 | 3.55 <sup>a</sup>                                    | 73.8       | 1                   |                             |                          |         |  |
|                                                                                                              | 3                 | LB                                                   | 75.3       |                     |                             |                          |         |  |
|                                                                                                              | 4                 | LB                                                   | ND         |                     |                             |                          |         |  |
|                                                                                                              | 5                 | LB                                                   | 75.1       |                     |                             |                          |         |  |
|                                                                                                              | 6                 | LB                                                   | 62.8       |                     |                             |                          |         |  |
|                                                                                                              | <b>Frc</b>        |                                                      |            |                     |                             |                          |         |  |
|                                                                                                              | 1'                | 3.67 <sup>a</sup>                                    | 64.0       |                     |                             | 2'                       |         |  |
|                                                                                                              | 2'                |                                                      | 106.4      |                     |                             |                          |         |  |
|                                                                                                              | 3'                | 4.21, d (8.8)                                        | 79.1       |                     | 4'                          | 4'                       |         |  |
|                                                                                                              | 4'                | 4.04, t (8.6)                                        | 76.7       |                     | 3'                          | 3', 6'                   |         |  |
| 5'                                                                                                           | 3.88 <sup>a</sup> | 84.1                                                 |            |                     |                             |                          |         |  |
| 6'                                                                                                           | LB                | 65.1                                                 |            |                     |                             |                          |         |  |
|                                                                                                              |                   |                                                      |            |                     |                             | <b>PWBr3</b>             | 342.30  |  |

<sup>a</sup>Multiplicity was not determined due to signal overlap.

(Supplementary Table 1. continued)

| metabolite (ID)                                                                                                                       | position | $\delta_H$ , mult ( $J$ in Hz) | $\delta_C$ | COSY<br>( <b>blue bold</b> ) | HMBC<br>(H $\rightarrow$ C) | Reference<br>sample code | MW (Da)      |
|---------------------------------------------------------------------------------------------------------------------------------------|----------|--------------------------------|------------|------------------------------|-----------------------------|--------------------------|--------------|
| <b>Sugars</b>                                                                                                                         |          |                                |            |                              |                             |                          |              |
| glucose ( <b>Glc</b> )<br>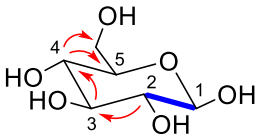<br>$\beta$ -glucopyranose | 1        | 4.63, d (8.0)                  | 98.6       | 2                            |                             |                          |              |
|                                                                                                                                       | 2        | 3.23, dd (9.4, 8.0)            | 76.8       | 1                            | 1, 3                        |                          |              |
|                                                                                                                                       | 3        | 3.48, t (9.4)                  | 78.5       |                              | 2, 4                        |                          |              |
|                                                                                                                                       | 4        | 3.39, t (9.4)                  | 72.3       |                              | 5, 6                        |                          |              |
|                                                                                                                                       | 5        | LB                             | 78.7       |                              |                             |                          |              |
|                                                                                                                                       | 6        | LB                             | 63.5       |                              |                             |                          |              |
|                                                                                                                                       |          |                                |            |                              |                             |                          | <b>PWBr3</b> |
| <br>$\alpha$ -glucopyranose                          | 1        | 5.22, d (3.8)                  | 94.8       | 2                            |                             |                          |              |
|                                                                                                                                       | 2        | 3.52 <sup>a</sup>              | 74.2       | 1                            |                             |                          |              |
|                                                                                                                                       | 3        | LB                             | 75.5       |                              |                             |                          |              |
|                                                                                                                                       | 4        | 3.40, t (9.6)                  | 72.4       |                              | 3, 6                        |                          |              |
|                                                                                                                                       | 5        | LB                             | 74.2       |                              |                             |                          |              |
|                                                                                                                                       | 6        | LB                             | 63.3       |                              |                             |                          |              |
|                                                                                                                                       |          |                                |            |                              |                             |                          |              |
| <br>trehalose ( <b>Tre</b> )                        | 1        | 5.18, d (3.8)                  | 95.9       | 2                            | 3, 5, 1'                    |                          |              |
|                                                                                                                                       | 2        | 3.64 <sup>a</sup>              | 73.8       | 1                            |                             |                          |              |
|                                                                                                                                       | 3        | LB                             | 75.2       |                              |                             |                          |              |
|                                                                                                                                       | 4        | 3.44, t (9.7)                  | 72.4       |                              | 3, 6                        |                          |              |
|                                                                                                                                       | 5        | LB                             | 74.9       |                              |                             |                          |              |
|                                                                                                                                       | 6        | 3.84, 3.75 <sup>a</sup>        | 63.2       |                              |                             |                          |              |
|                                                                                                                                       | 1'       | 5.18, d (3.8)                  | 95.9       | 2'                           | 1, 3', 5'                   | <b>PWB</b>               | 342.30       |
|                                                                                                                                       | 2'       | 3.64 <sup>a</sup>              | 73.8       | 1'                           |                             |                          |              |
|                                                                                                                                       | 3'       | LB                             | 75.2       |                              |                             |                          |              |
|                                                                                                                                       | 4'       | 3.44, t (9.7)                  | 72.4       |                              | 3', 6'                      |                          |              |
|                                                                                                                                       | 5'       | LB                             | 74.9       |                              |                             |                          |              |
|                                                                                                                                       | 6'       | 3.84, 3.75 <sup>a</sup>        | 63.2       |                              |                             |                          |              |

<sup>a</sup>Multiplicity was not determined due to signal overlap.

(Supplementary Table 1. continued)

| metabolite (ID)                                                                                                    | position                         | $\delta_H$ , mult ( <i>J</i> in Hz) | $\delta_C$ , mult ( <i>J</i> in Hz) | COSY<br>( <b>blue bold</b> ) | HMBC<br>(H $\rightarrow$ C) | Reference<br>sample code | MW (Da) |
|--------------------------------------------------------------------------------------------------------------------|----------------------------------|-------------------------------------|-------------------------------------|------------------------------|-----------------------------|--------------------------|---------|
| <b>Choline derivatives</b>                                                                                         |                                  |                                     |                                     |                              |                             |                          |         |
| 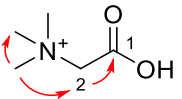<br>betaine ( <b>Bt</b> )         | 1                                | -                                   | 172.0                               |                              |                             |                          |         |
|                                                                                                                    | 2                                | 3.89, s                             | 68.89, t<br>(3.00)                  |                              | 1, NCH <sub>3</sub>         | <b>PWB</b>               | 117.15  |
|                                                                                                                    | N(CH <sub>3</sub> ) <sub>3</sub> | 3.25, s                             | 56.08, t<br>(3.75)                  |                              | 2, NCH <sub>3</sub>         |                          |         |
| <br>choline sulfate ( <b>CS</b> ) | 1                                | 4.49, m                             | 64.7                                | 2                            |                             | <b>PWB</b>               | 183.23  |
|                                                                                                                    | 2                                | 3.75 <sup>a</sup>                   | 67.50, t<br>(3.00)                  | 1                            | NCH <sub>3</sub>            |                          |         |
|                                                                                                                    | N(CH <sub>3</sub> ) <sub>3</sub> | 3.22, s                             | 56.65, t<br>(3.75)                  |                              | 2, NCH <sub>3</sub>         |                          |         |
| <br>choline ( <b>Cho</b> )        | 1                                | 4.05 <sup>a</sup>                   | 58.3                                | 2                            |                             | <b>PWB</b>               | 104.17  |
|                                                                                                                    | 2                                | 3.51, m                             | 70.13, t<br>(3.00)                  | 1                            | NCH <sub>3</sub>            |                          |         |
|                                                                                                                    | N(CH <sub>3</sub> ) <sub>3</sub> | 3.19, s                             | 56.59, t<br>(3.75)                  |                              | 2, NCH <sub>3</sub>         |                          |         |

<sup>a</sup>Multiplicity was not determined due to signal overlap.



(Supplementary Table 1. continued)

| metabolite (ID)                                                                    | position | $\delta_H$ , mult ( $J$ in Hz) | $\delta_C$ | COSY<br>( <b>blue bold</b> ) | HMBC<br>(H $\rightarrow$ C) | Reference<br>sample code | MW (Da) |
|------------------------------------------------------------------------------------|----------|--------------------------------|------------|------------------------------|-----------------------------|--------------------------|---------|
| <b>Nucleosides</b>                                                                 |          |                                |            |                              |                             |                          |         |
| 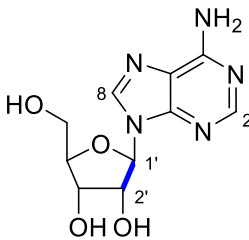  | 2        | LB                             | ND         |                              |                             |                          |         |
|                                                                                    | 8        | LB                             | ND         |                              |                             |                          |         |
|                                                                                    | 1'       | 6.06 (d, $J = 6.0$ Hz)         | ND         | 2'                           |                             |                          |         |
|                                                                                    | 2'       | 4.79                           | ND         |                              |                             |                          |         |
|                                                                                    | 3'       | LB                             | ND         |                              |                             |                          |         |
|                                                                                    | 4'       | LB                             | ND         |                              |                             |                          |         |
|                                                                                    | 5'       | LB                             | ND         |                              |                             |                          |         |
| adenosine ( <b>Ado</b> )                                                           |          |                                |            |                              |                             | <b>PWB</b>               | 267.24  |
|  | 5        | 5.89, d (8.0)                  | ND         | 6                            |                             |                          |         |
|                                                                                    | 6        | 7.86, d (8.1)                  | ND         | 5                            |                             |                          |         |
|                                                                                    | 1'       | 5.90, d (4.5)                  | ND         | 2'                           |                             |                          |         |
|                                                                                    | 2'       | 4.34 <sup>a</sup>              | ND         | 1'                           |                             |                          |         |
|                                                                                    | 3'       | LB                             | ND         |                              |                             |                          |         |
|                                                                                    | 4'       | LB                             | ND         |                              |                             |                          |         |
|                                                                                    | 5'       | LB                             | ND         |                              |                             |                          |         |
| uridine ( <b>Urd</b> )                                                             |          |                                |            |                              |                             | <b>PWB</b>               | 244.20  |

<sup>a</sup>Multiplicity was not determined due to signal overlap.

(Supplementary Table 1. continued)

| metabolite (ID)                                                                                                | position | $\delta_H$ , mult ( $J$ in Hz) | $\delta_C$ | COSY<br>(blue bold) | HMBC<br>(H $\rightarrow$ C) | Reference<br>sample code | MW (Da) |
|----------------------------------------------------------------------------------------------------------------|----------|--------------------------------|------------|---------------------|-----------------------------|--------------------------|---------|
| <b>Organic acids</b>                                                                                           |          |                                |            |                     |                             |                          |         |
| 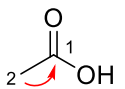<br>acetate ( <b>AcA</b> )    | 1        |                                | 184.0      |                     |                             |                          |         |
|                                                                                                                | 2        | 1.91, s                        | 25.8       |                     | 1                           | <b>PWBr19</b>            | 60.05   |
| <br>azelate ( <b>AzA</b> )    | 1        |                                | 186.5      |                     |                             |                          |         |
|                                                                                                                | 2        | 2.18, t (7.5)                  | 40.0       | 3                   | 1, 3, 4                     |                          |         |
|                                                                                                                | 3        | 1.54 <sup>a</sup>              | 28.4       | 2, 4                | 4                           |                          |         |
|                                                                                                                | 4        | 1.30 <sup>a</sup>              | 31.3       | 3                   | 5                           |                          |         |
|                                                                                                                | 5        | 1.30 <sup>a</sup>              | 31.0       |                     |                             | <b>PWB</b>               | 188.22  |
|                                                                                                                | 6        | 1.30 <sup>a</sup>              | 31.3       | 7                   |                             |                          |         |
|                                                                                                                | 7        | 1.54 <sup>a</sup>              | 28.4       | 6, 8                |                             |                          |         |
|                                                                                                                | 8        | 2.18, t (7.5)                  | 40.0       | 7                   | 6, 7, 9                     |                          |         |
|                                                                                                                | 9        |                                | 186.5      |                     |                             |                          |         |
| <br>formate ( <b>FA</b> )    | 1        | 8.44, s                        | 173.8      |                     |                             | <b>PWB</b>               | 46.03   |
|                                                                                                                |          |                                |            |                     |                             |                          |         |
| <br>fumarate ( <b>FmA</b> ) | 1        |                                | 177.4      |                     |                             |                          |         |
|                                                                                                                | 2        | 6.51, s                        | 138.0      | 1, 4                |                             |                          |         |
|                                                                                                                | 3        | 6.51, s                        | 138.0      | 1, 4                |                             | <b>PWB</b>               | 116.07  |
|                                                                                                                | 4        |                                | 177.4      |                     |                             |                          |         |

<sup>a</sup>Multiplicity was not determined due to signal overlap.

(Supplementary Table 1. continued)

| metabolite (ID)                                                                                                | position | $\delta_H$ , mult ( $J$ in Hz)                        | $\delta_C$         | COSY<br>(blue bold) | HMBC<br>(H $\rightarrow$ C) | Reference<br>sample code | MW (Da) |
|----------------------------------------------------------------------------------------------------------------|----------|-------------------------------------------------------|--------------------|---------------------|-----------------------------|--------------------------|---------|
| 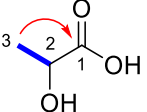<br>lactate ( <b>LA</b> )     | 1        |                                                       | 185.3 <sup>b</sup> |                     |                             |                          |         |
|                                                                                                                | 2        | 4.10 <sup>a</sup>                                     | 71.2               | 3                   |                             |                          |         |
|                                                                                                                | 3        | 1.32, d (7.0)                                         | 22.8               | 2                   | 1                           | <b>PWB</b>               | 90.08   |
| <br>malate ( <b>MA</b> )      | 1        |                                                       | 182.2              |                     |                             |                          |         |
|                                                                                                                | 2        | 4.29, dd (10.0, 3.1)                                  | 73.0               | 3                   | 1, 3, 4                     |                          |         |
|                                                                                                                | 3        | 2.67, dd (15.5, 3.1), Ha<br>2.38, dd (15.5, 10.0), Hb | 45.1               | 2, Ha/Hb            | 1, 2                        | <b>PWB</b>               | 134.09  |
|                                                                                                                | 4        |                                                       | 183.6              |                     |                             |                          |         |
| <br>malonate ( <b>MnA</b> )   | 1        |                                                       | ND                 |                     |                             |                          |         |
|                                                                                                                | 2        | 3.13, s                                               | 51.0 <sup>b</sup>  |                     |                             | <b>PWB</b>               | 104.06  |
|                                                                                                                | 3        |                                                       | ND                 |                     |                             |                          |         |
| <br>succinate ( <b>SA</b> ) | 1        |                                                       | ND                 |                     |                             |                          |         |
|                                                                                                                | 2        | 2.42, s                                               | 36.3               |                     |                             |                          |         |
|                                                                                                                | 3        | 2.42, s                                               | 36.3               |                     |                             | <b>PWBr19</b>            | 118.09  |
|                                                                                                                | 4        |                                                       | ND                 |                     |                             |                          |         |

<sup>a</sup>Multiplicity was not determined due to signal overlap. <sup>b</sup>chemical shift was extracted from HMBC correlation.

(Supplementary Table 1. continued)

| metabolite (ID)                                                                                                              | position | $\delta_H$ , mult ( $J$ in Hz)                       | $\delta_C$         | COSY<br>(blue bold) | HMBC<br>(H $\rightarrow$ C) | Reference<br>sample code | MW (Da) |
|------------------------------------------------------------------------------------------------------------------------------|----------|------------------------------------------------------|--------------------|---------------------|-----------------------------|--------------------------|---------|
| <b>Amino acids</b>                                                                                                           |          |                                                      |                    |                     |                             |                          |         |
| 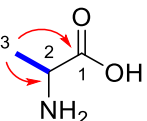<br>alanine ( <b>Ala</b> )                  | 1        |                                                      | 178.5              |                     |                             |                          |         |
|                                                                                                                              | 2        | 3.77 <sup>a</sup>                                    | 53.2               | 3                   |                             |                          |         |
|                                                                                                                              | 3        | 1.47, d (7.3)                                        | 18.9               | 2                   | 1, 2                        | <b>PWB</b>               | 89.09   |
| <br>$\gamma$ -aminobutyrate ( <b>GABA</b> ) | 1        |                                                      | 184.2 <sup>b</sup> |                     |                             |                          |         |
|                                                                                                                              | 2        | 2.29, t (7.4)                                        | 37.0               | 3                   | 1                           |                          |         |
|                                                                                                                              | 3        | 1.89 <sup>a</sup>                                    | 26.3               | 2, 4                |                             | <b>PWB</b>               | 103.12  |
|                                                                                                                              | 4        | 3.00, br t (7.6)                                     | 42.0               | 3                   |                             |                          |         |
| <br>asparagine ( <b>Asn</b> )               | 1        |                                                      | ND                 |                     |                             |                          |         |
|                                                                                                                              | 2        | 4.00 <sup>a</sup>                                    | ND                 | 3                   |                             |                          |         |
|                                                                                                                              | 3        | 2.94, dd (16.9, 4.2), Ha<br>2.85, dd (16.9, 7.8), Hb | ND                 | 2                   |                             | <b>PWB</b>               | 132.12  |
|                                                                                                                              | 4        |                                                      | ND                 |                     |                             |                          |         |
| <br>aspartate ( <b>Asp</b> )              | 1        |                                                      | ND                 |                     |                             |                          |         |
|                                                                                                                              | 2        | 3.90 <sup>a</sup>                                    | ND                 | 3                   |                             |                          |         |
|                                                                                                                              | 3        | 2.80, dd (17.5, 3.8), Ha<br>2.67 <sup>a</sup> , Hb   | ND                 | 2, Ha/Hb            |                             | <b>PWB</b>               | 133.10  |
|                                                                                                                              | 4        |                                                      | ND                 |                     |                             |                          |         |

<sup>a</sup>Multiplicity was not determined due to signal overlap. <sup>b</sup>chemical shift was extracted from HMBC correlation.

(Supplementary Table 1. continued)

| metabolite (ID)                                                                                                | position | $\delta_H$ , mult ( $J$ in Hz) | $\delta_C$         | COSY<br>(blue bold) | HMBC<br>(H $\rightarrow$ C) | Reference<br>sample code | MW (Da) |
|----------------------------------------------------------------------------------------------------------------|----------|--------------------------------|--------------------|---------------------|-----------------------------|--------------------------|---------|
| <b>Amino acids</b>                                                                                             |          |                                |                    |                     |                             |                          |         |
| 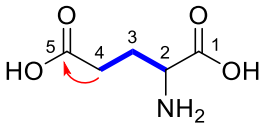<br>glutamate ( <b>Glu</b> )  | 1        |                                | ND                 |                     |                             |                          |         |
|                                                                                                                | 2        | 3.75 <sup>a</sup>              | 57.3               | 3                   |                             |                          |         |
|                                                                                                                | 3        | 2.11, 2.06 <sup>a</sup>        | 29.6               | 2, 4                |                             |                          |         |
|                                                                                                                | 4        | 2.34 <sup>a</sup>              | 36.1               | 3                   | 5                           | <b>PWB</b>               | 147.13  |
|                                                                                                                | 5        |                                | 183.8 <sup>b</sup> |                     |                             |                          |         |
| <br>glutamine ( <b>Gln</b> )  | 1        |                                | ND                 |                     |                             |                          |         |
|                                                                                                                | 2        | 3.77 <sup>a</sup>              | 56.8               | 3                   |                             |                          |         |
|                                                                                                                | 3        | 2.13 <sup>a</sup>              | 28.9               | 2, 4                |                             |                          |         |
|                                                                                                                | 4        | 2.45 <sup>a</sup>              | 33.5               | 3                   | 5                           | <b>PWB</b>               | 146.14  |
|                                                                                                                | 5        |                                | 180.4 <sup>b</sup> |                     |                             |                          |         |
| <br>isoleucine ( <b>Ile</b> ) | 1        |                                | ND                 |                     |                             |                          |         |
|                                                                                                                | 2        | LB                             | ND                 |                     |                             |                          |         |
|                                                                                                                | 3        | 1.97 <sup>a</sup>              | ND                 | 6                   |                             |                          |         |
|                                                                                                                | 4        | LB                             | ND                 |                     |                             | <b>PWB</b>               | 131.17  |
|                                                                                                                | 5        | LB                             | ND                 |                     |                             |                          |         |
|                                                                                                                | 6        | 1.00, d (7.0)                  | ND                 | 3                   |                             |                          |         |
| <br>leucine ( <b>Leu</b> )  | 1        |                                | ND                 |                     |                             |                          |         |
|                                                                                                                | 2        | LB                             | ND                 |                     |                             |                          |         |
|                                                                                                                | 3        | LB                             | ND                 |                     |                             |                          |         |
|                                                                                                                | 4        | 1.71 <sup>a</sup>              | ND                 | 5, 6                |                             | <b>PWB</b>               | 131.17  |
|                                                                                                                | 5, 6     | 0.95 <sup>a</sup>              | ND                 | 4                   |                             |                          |         |
|                                                                                                                |          |                                |                    |                     |                             |                          |         |

<sup>a</sup>Multiplicity was not determined due to signal overlap. <sup>b</sup>chemical shift was extracted from HMBC correlation.

(Supplementary Table 1. continued)

| metabolite (ID)                                                                                                   | position | $\delta_{\text{H}}$ , mult ( $J$ in Hz) | $\delta_{\text{C}}$ | COSY<br>(blue bold) | HMBC<br>(H $\rightarrow$ C) | Reference<br>sample code | MW (Da) |
|-------------------------------------------------------------------------------------------------------------------|----------|-----------------------------------------|---------------------|---------------------|-----------------------------|--------------------------|---------|
| <b>Amino acids</b>                                                                                                |          |                                         |                     |                     |                             |                          |         |
| 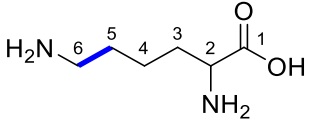<br>lysine ( <b>Lys</b> )        | 1        | LB                                      | ND                  |                     |                             | <b>PWB</b>               | 146.19  |
|                                                                                                                   | 2        | LB                                      | ND                  |                     |                             |                          |         |
|                                                                                                                   | 3        | LB                                      | ND                  |                     |                             |                          |         |
|                                                                                                                   | 4        | LB                                      | ND                  |                     |                             |                          |         |
|                                                                                                                   | 5        | 1.71 <sup>a</sup>                       | ND                  | 6                   |                             |                          |         |
|                                                                                                                   | 6        | 3.01 <sup>a</sup>                       | ND                  | 5                   |                             |                          |         |
| <br>proline ( <b>Pro</b> )       | 1        |                                         | ND                  |                     |                             | <b>PWB</b>               | 115.13  |
|                                                                                                                   | 2        | 4.12, d (9.1, 6.7)                      | 63.9                |                     |                             |                          |         |
|                                                                                                                   | 3        | LB                                      | 31.7                |                     |                             |                          |         |
|                                                                                                                   | 4        | 1.99 <sup>a</sup>                       | 26.5                | 5                   |                             |                          |         |
|                                                                                                                   | 5        | 3.41, 3.33 <sup>a</sup>                 | 48.8                | 4                   |                             |                          |         |
| <br>pyroglutamate ( <b>Glp</b> ) | 1        |                                         | 184.5               |                     |                             | <b>PWB</b>               | 129.11  |
|                                                                                                                   | 2        | 2.39 <sup>a</sup>                       | 32.4                |                     |                             |                          |         |
|                                                                                                                   | 3        | 2.50, m, Ha<br>2.02, m, Hb              | 28.1                | 4                   | 1, 5                        |                          |         |
|                                                                                                                   | 4        | 4.16, dd (9.0, 5.8)                     | 61.1                | 3                   |                             |                          |         |
|                                                                                                                   | 5        |                                         | 183.1               |                     |                             |                          |         |
| <br>threonine ( <b>Thr</b> )   | 1        |                                         | ND                  |                     |                             | <b>PWB</b>               | 119.12  |
|                                                                                                                   | 2        | LB                                      | ND                  |                     |                             |                          |         |
|                                                                                                                   | 3        | 4.24 <sup>a</sup>                       | ND                  | 4                   |                             |                          |         |
|                                                                                                                   | 4        | 1.32 <sup>a</sup>                       | ND                  | 3                   |                             |                          |         |
| <br>valine ( <b>Val</b> )      | 1        |                                         | ND                  |                     |                             | <b>PWB</b>               | 117.15  |
|                                                                                                                   | 2        | LB                                      | ND                  |                     |                             |                          |         |
|                                                                                                                   | 3        | 2.27 <sup>a</sup>                       | ND                  | 4, 5                |                             |                          |         |
|                                                                                                                   | 4        | 1.03, d (7.0)                           | 20.7                | 3                   |                             |                          |         |
|                                                                                                                   | 5        | 0.98, d (7.0)                           | 19.4                | 3                   |                             |                          |         |

<sup>a</sup>Multiplicity was not determined due to signal overlap.

**Supplementary Table 2. BMRD codes of the identified metabolites**

| metabolite name                   | BMRD code  | metabolite name                | BMRD code     |
|-----------------------------------|------------|--------------------------------|---------------|
| <b><u>Sugar alcohols</u></b>      |            | <b><u>Organic acids</u></b>    |               |
| arabinitol (Ara)                  | bmse000068 | acetate (AcA)                  | bmse000857    |
| glycerol (Glo)                    | bmse000184 | azelate (AzA)                  | not available |
| mannitol (Man)                    | bmse000099 | formate (FA)                   | bmse000203    |
| <b><u>Sugars</u></b>              |            | fumarate (FmA)                 | bmse000083    |
| fructose (Frc)                    | bmse000010 | lactate (LA)                   | bmse000208    |
| glucose (Glc)                     | bmse000015 | malate (MA)                    | bmse000046    |
| sucrose (Suc)                     | bmse000119 | malonate (MnA)                 | bmse000386    |
| trehalose (Tre)                   | bmse000125 | succinate (SA)                 | bmse000183    |
| <b><u>Choline derivatives</u></b> |            | <b><u>Amino acids</u></b>      |               |
| betaine (Bt)                      | bmse000069 | alanine (Ala)                  | bmse000028    |
| choline (Cho)                     | bmse000285 | $\gamma$ -aminobutyrate (GABA) | bmse000340    |
| choline sulfate (CS)              | -          | asparagine (Asn)               | bmse000030    |
| <b><u>Nucleosides</u></b>         |            | aspartate (Asp)                | bmse000875    |
| adenosine (Ado)                   | bmse000061 | glutamate (Glu)                | bmse000037    |
| uridine (Urd)                     | bmse000158 | glutamine (Gln)                | bmse000038    |
|                                   |            | isoleucine (Ile)               | bmse000041    |
|                                   |            | leucine (Leu)                  | bmse000042    |
|                                   |            | lysine (Lys)                   | bmse000043    |
|                                   |            | proline (Pro)                  | bmse000047    |
|                                   |            | pyroglutamate (Glp)            | not available |
|                                   |            | threonine (Thr)                | bmse000049    |
|                                   |            | valine (Val)                   | bmse000052    |

# Arabinitol (Ara)

PWB

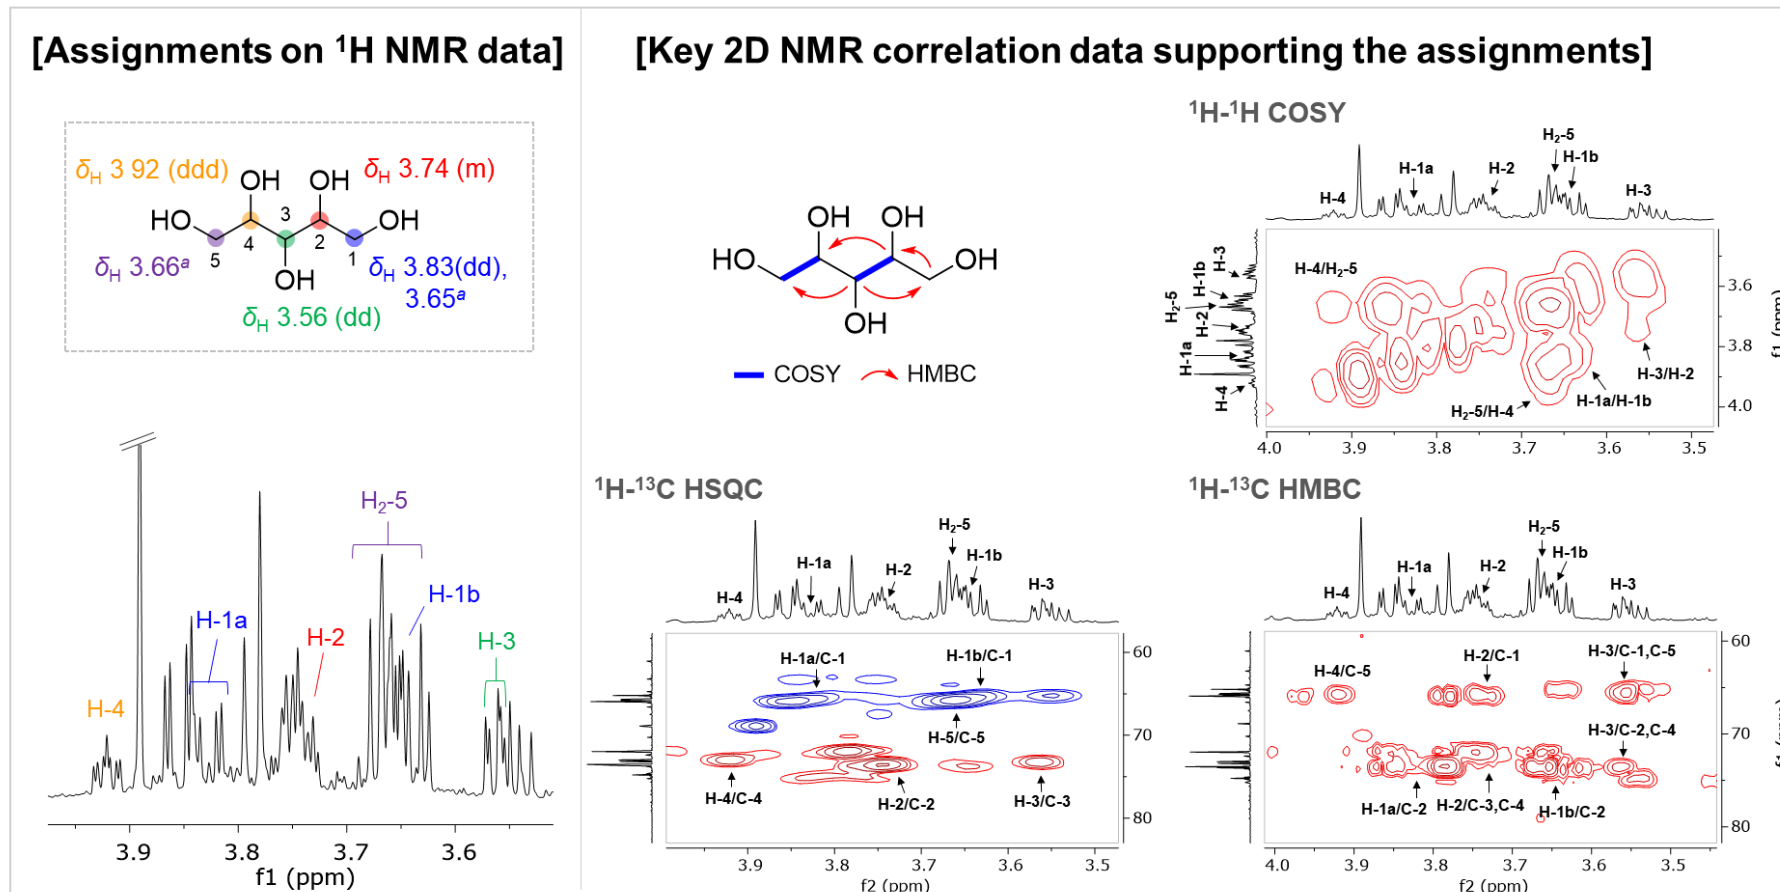

<sup>a</sup>Multiplicity was not determined due to signal overlapping.

Biological Magnetic Resonance Data Bank (BMRB) code: bmse000068

Supplementary Figure 3. Detailed 2D NMR (600 MHz, D<sub>2</sub>O) data analysis of arabinitol (Ara) in PWB



Glycerol (Glo)

PWB

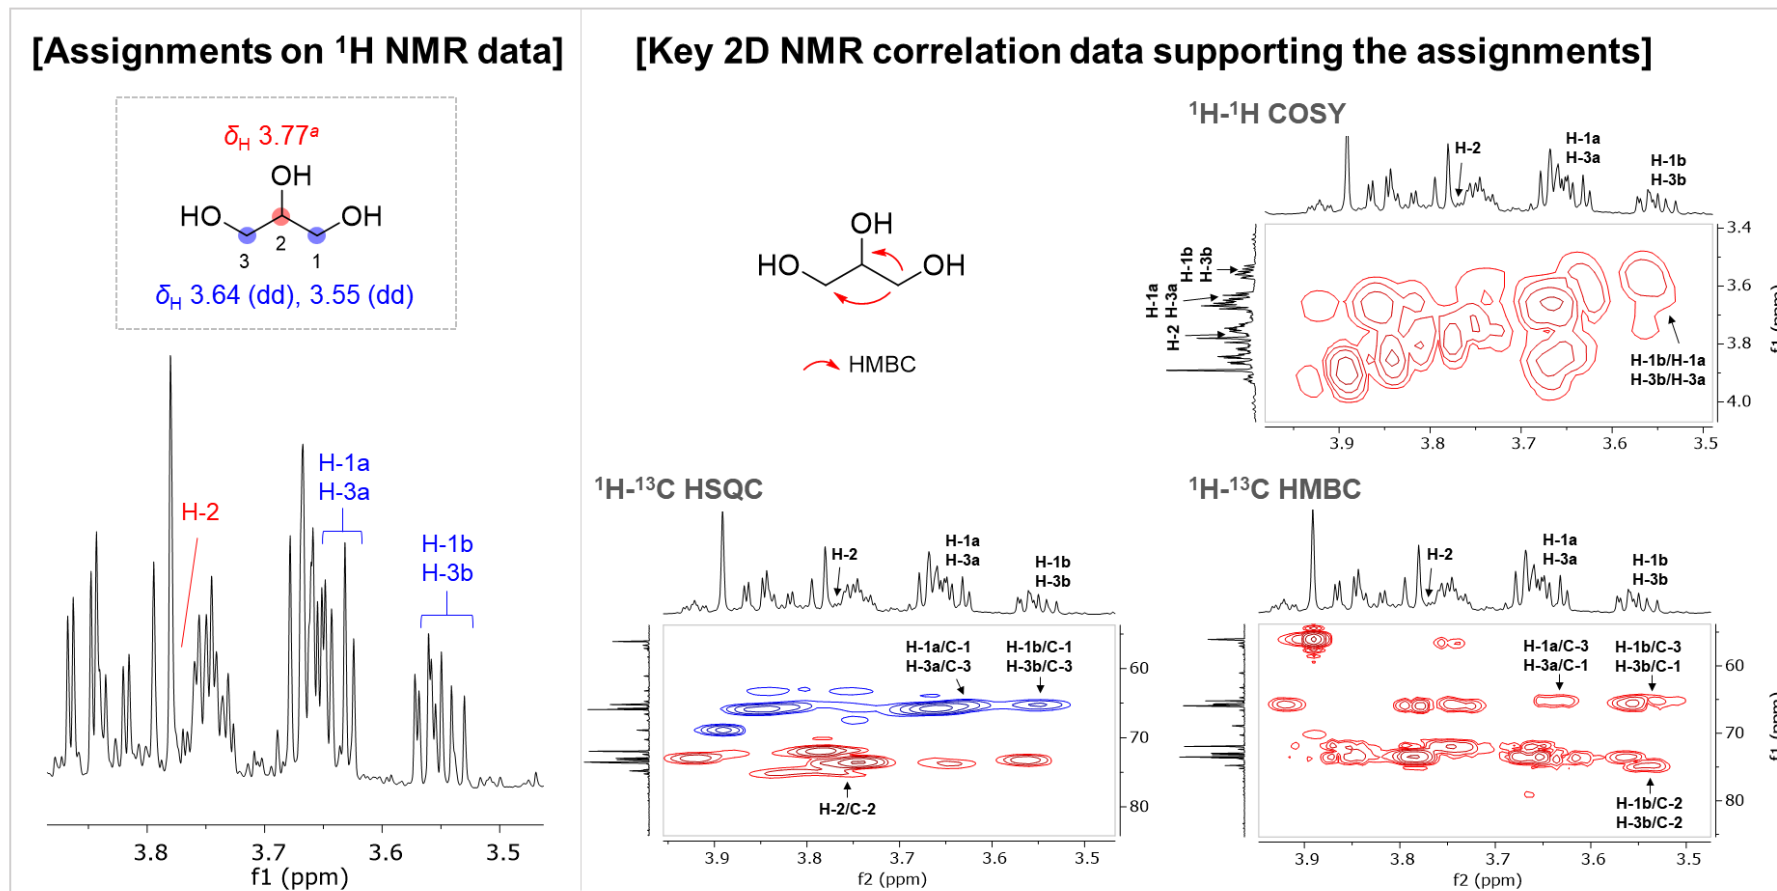

<sup>a</sup>Multiplicity was not determined due to signal overlapping.

Biological Magnetic Resonance Data Bank (BMRB) code: bmse0000184

Supplementary Figure 4. Detailed 2D NMR (600 MHz, D<sub>2</sub>O) data analysis of glycerol (Glo) in PWB

# Mannitol (Man)

PWB

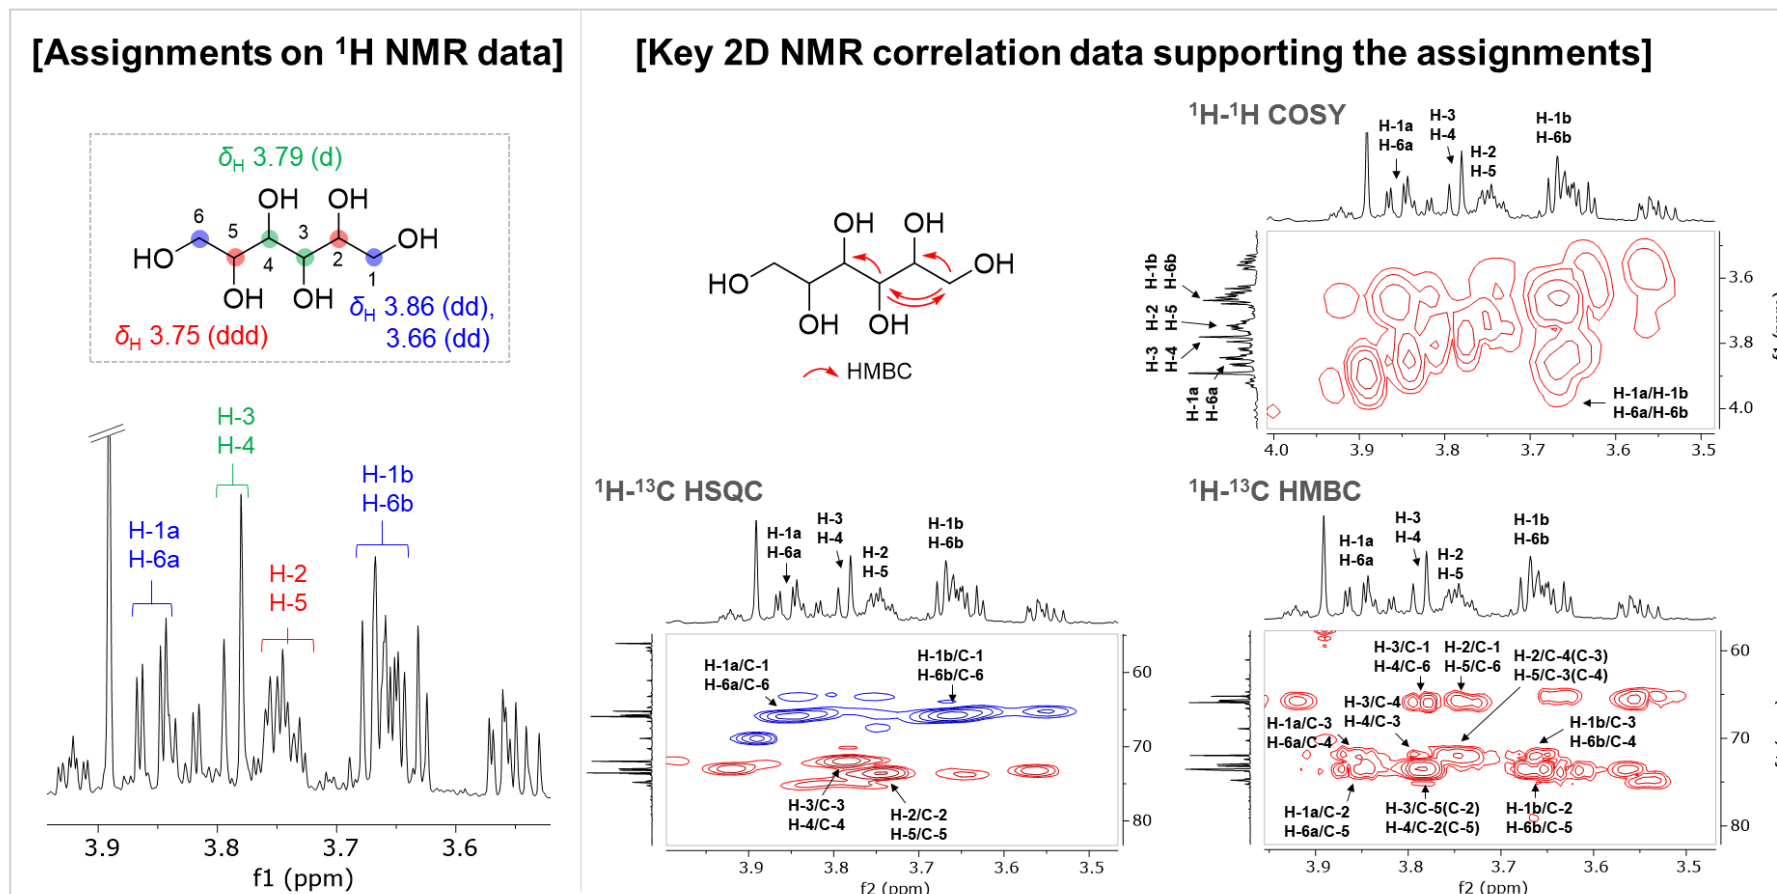

<sup>a</sup>Multiplicity was not determined due to signal overlapping.

Biological Magnetic Resonance Data Bank (BMRD) code: bmse000099

Supplementary Figure 5. Detailed 2D NMR (600 MHz, D<sub>2</sub>O) data analysis of mannitol (Man) in PWB

“Ratios of absolute peak integration in experimental data”

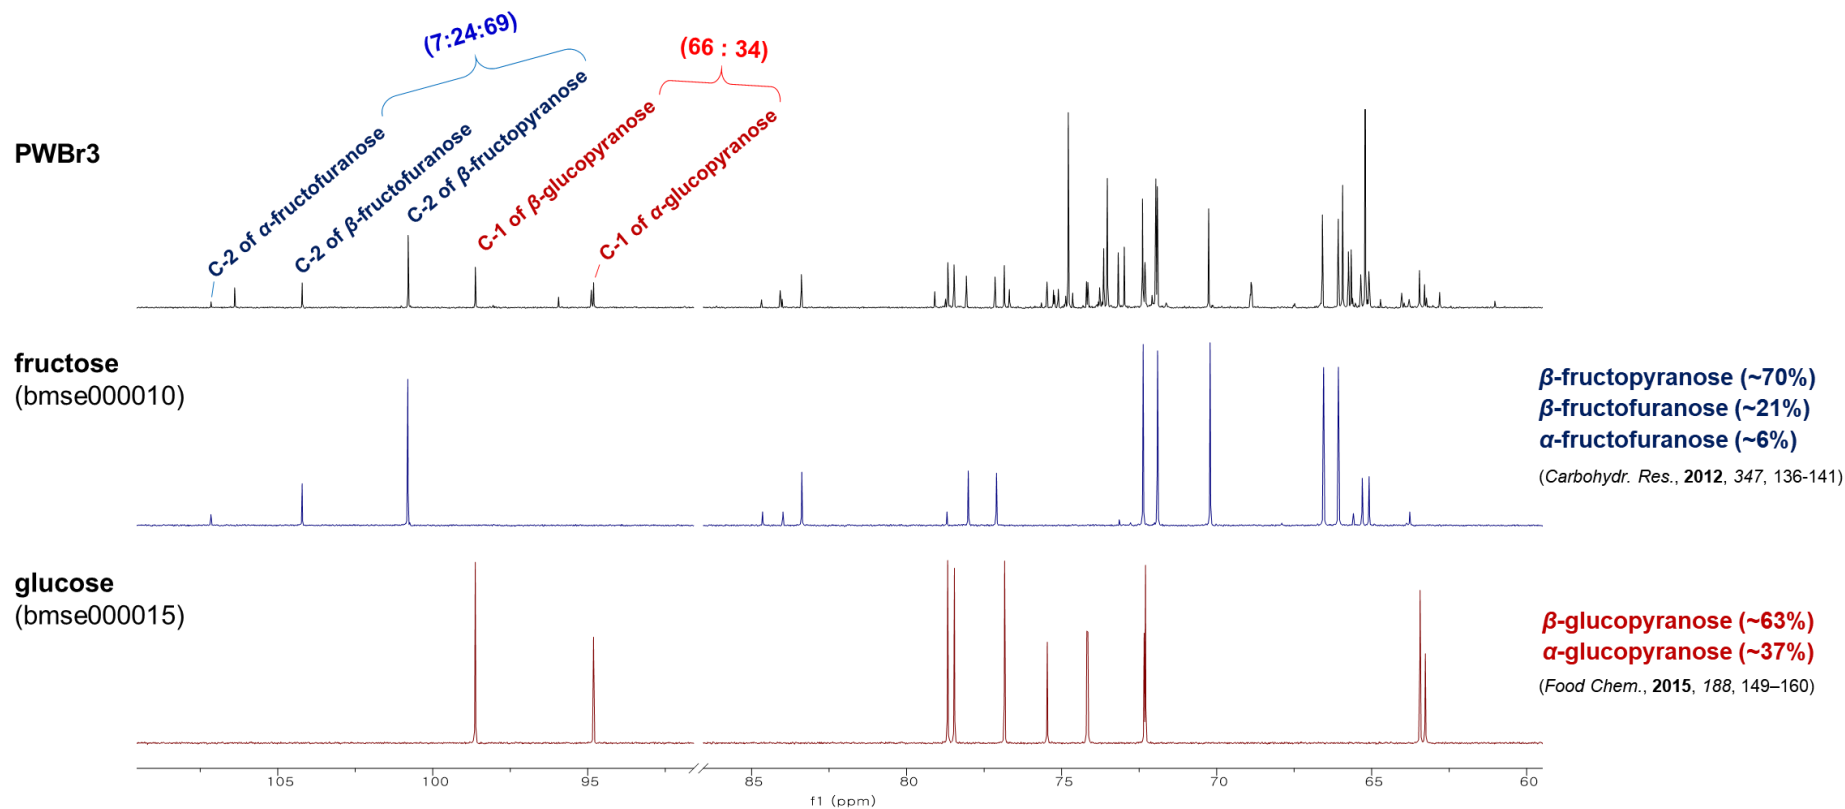

**Supplementary Figure 6.**  $^{13}\text{C}$  NMR data (150 MHz,  $\text{D}_2\text{O}$ ) of **PWBr3** with BMRD reference data of fructose (bmse000010) and glucose (bmse000015)

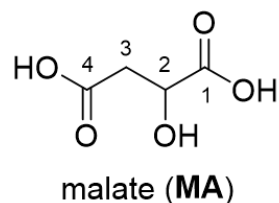

An extracted spectrum from  $^1\text{H}$  NMR data of PWB

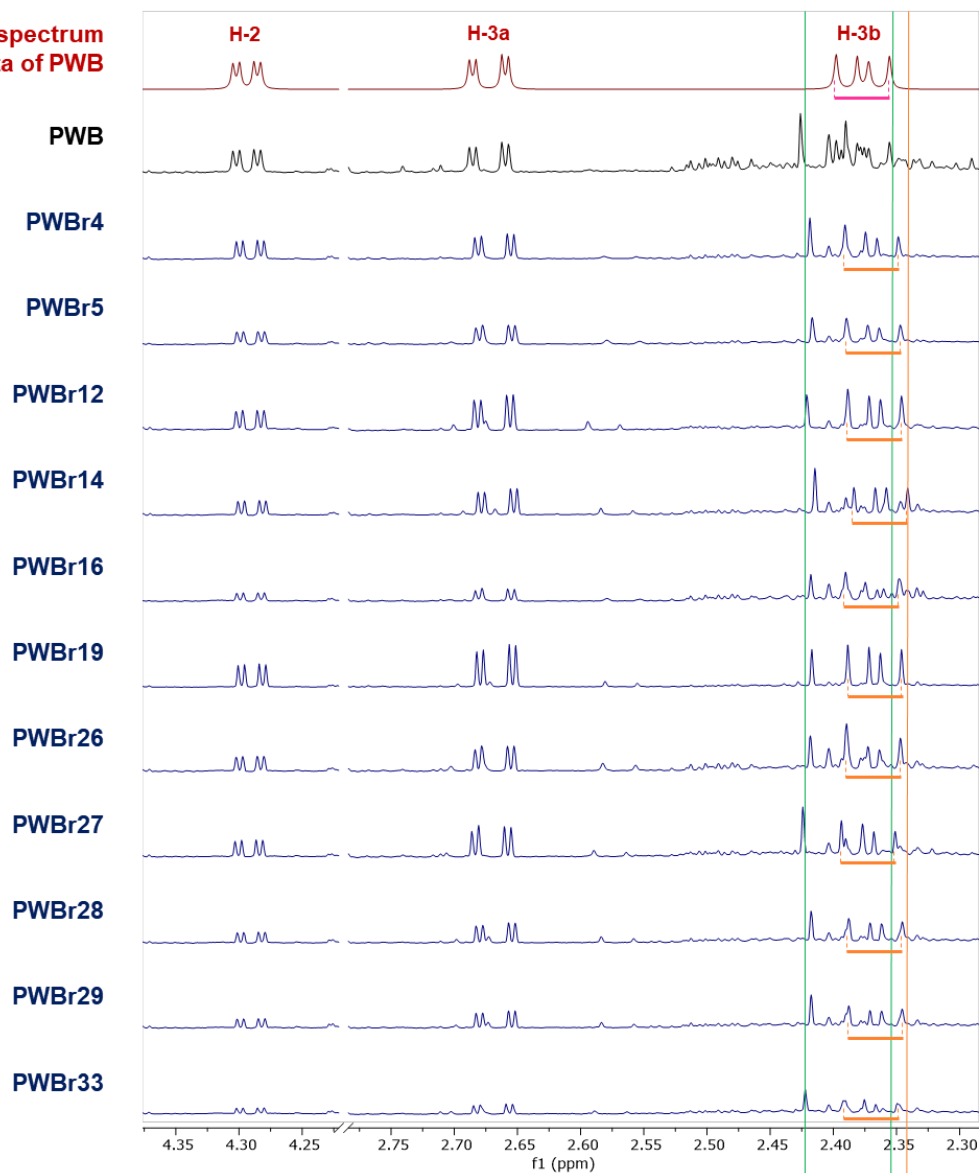

The range of H-3b  $^1\text{H}$  NMR chemical shift, reliable for annotation in the Chemomx-embedded library ( $\delta_{\text{H}}$  2.3732-2.4140 ppm of cluster center)  $\longleftrightarrow$

An extended range of the H-3b chemical shift ( $\delta_{\text{H}}$  2.3620-2.4140 ppm of cluster center)  $\dashleftarrow$

Supplementary Figure 7. Stacked  $^1\text{H}$  NMR (600 MHz,  $\text{D}_2\text{O}$ ) spectra in an expansion for malate (MA) signals

# Malate (MA)

PWB

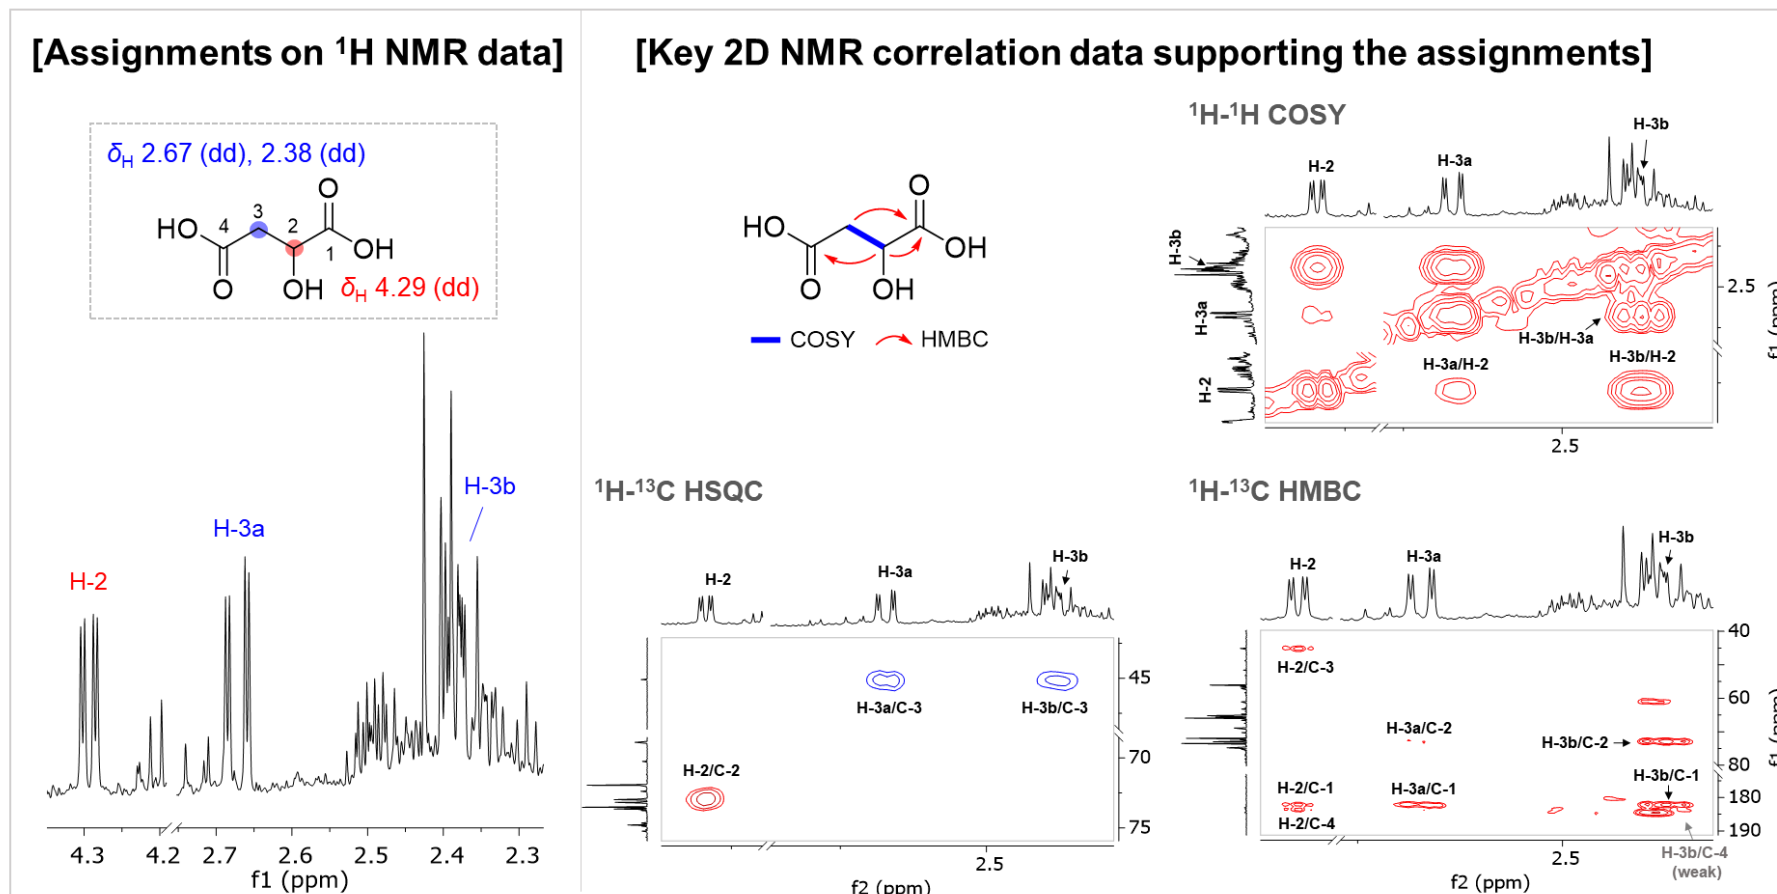

<sup>a</sup>Multiplicity was not determined due to signal overlapping.

Biological Magnetic Resonance Data Bank (BMRB) code: bmse000046

**Supplementary Figure 8.** Detailed 2D NMR (600 MHz, D<sub>2</sub>O) data analysis of malate (MA) in PWB

Key  $^1\text{H}$ - $^1\text{H}$  COSY NMR correlation

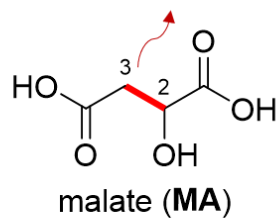

PWB

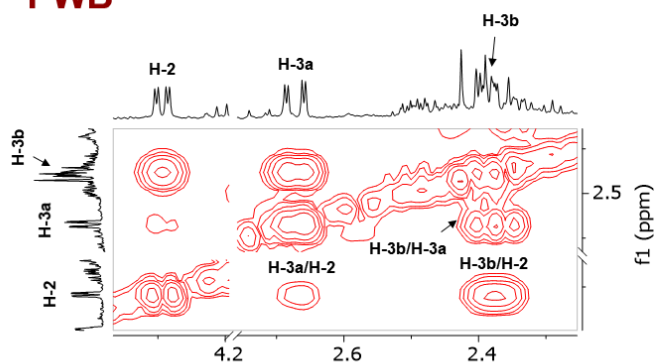

PWBr14

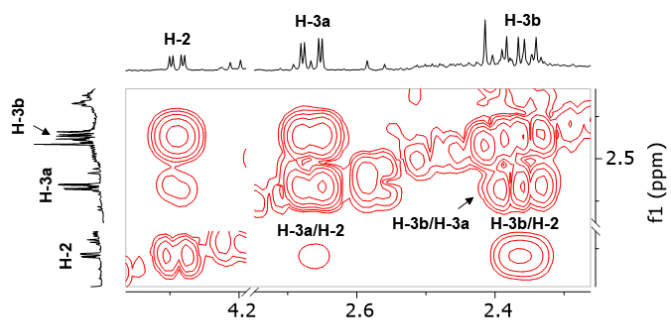

PWBr19

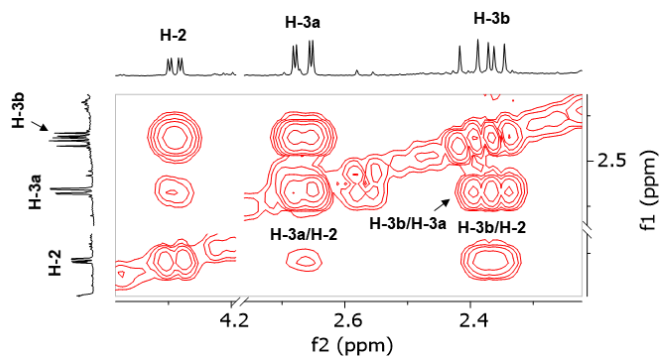

Supplementary Figure 9. Key  $^1\text{H}$ - $^1\text{H}$  COSY (600 MHz,  $\text{D}_2\text{O}$ ) correlations of malate in PWB, PWBr14, and PWBr19

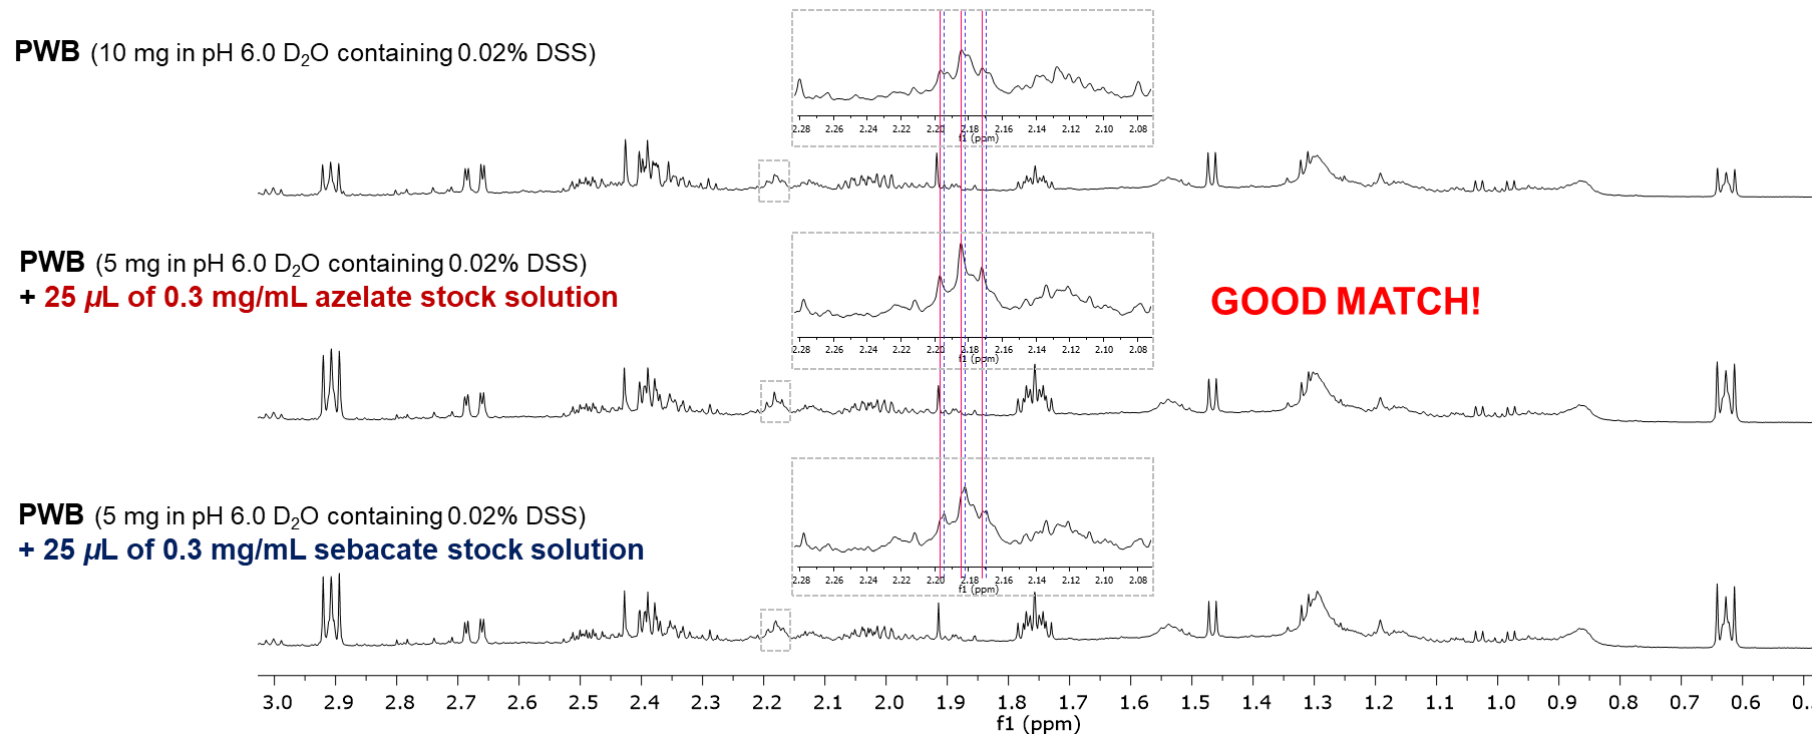

Supplementary Figure 10. Spiking <sup>1</sup>H NMR experiments (600 MHz, D<sub>2</sub>O) with commercial standards of azelate and sebacate

Betaine (Bt)

PWB

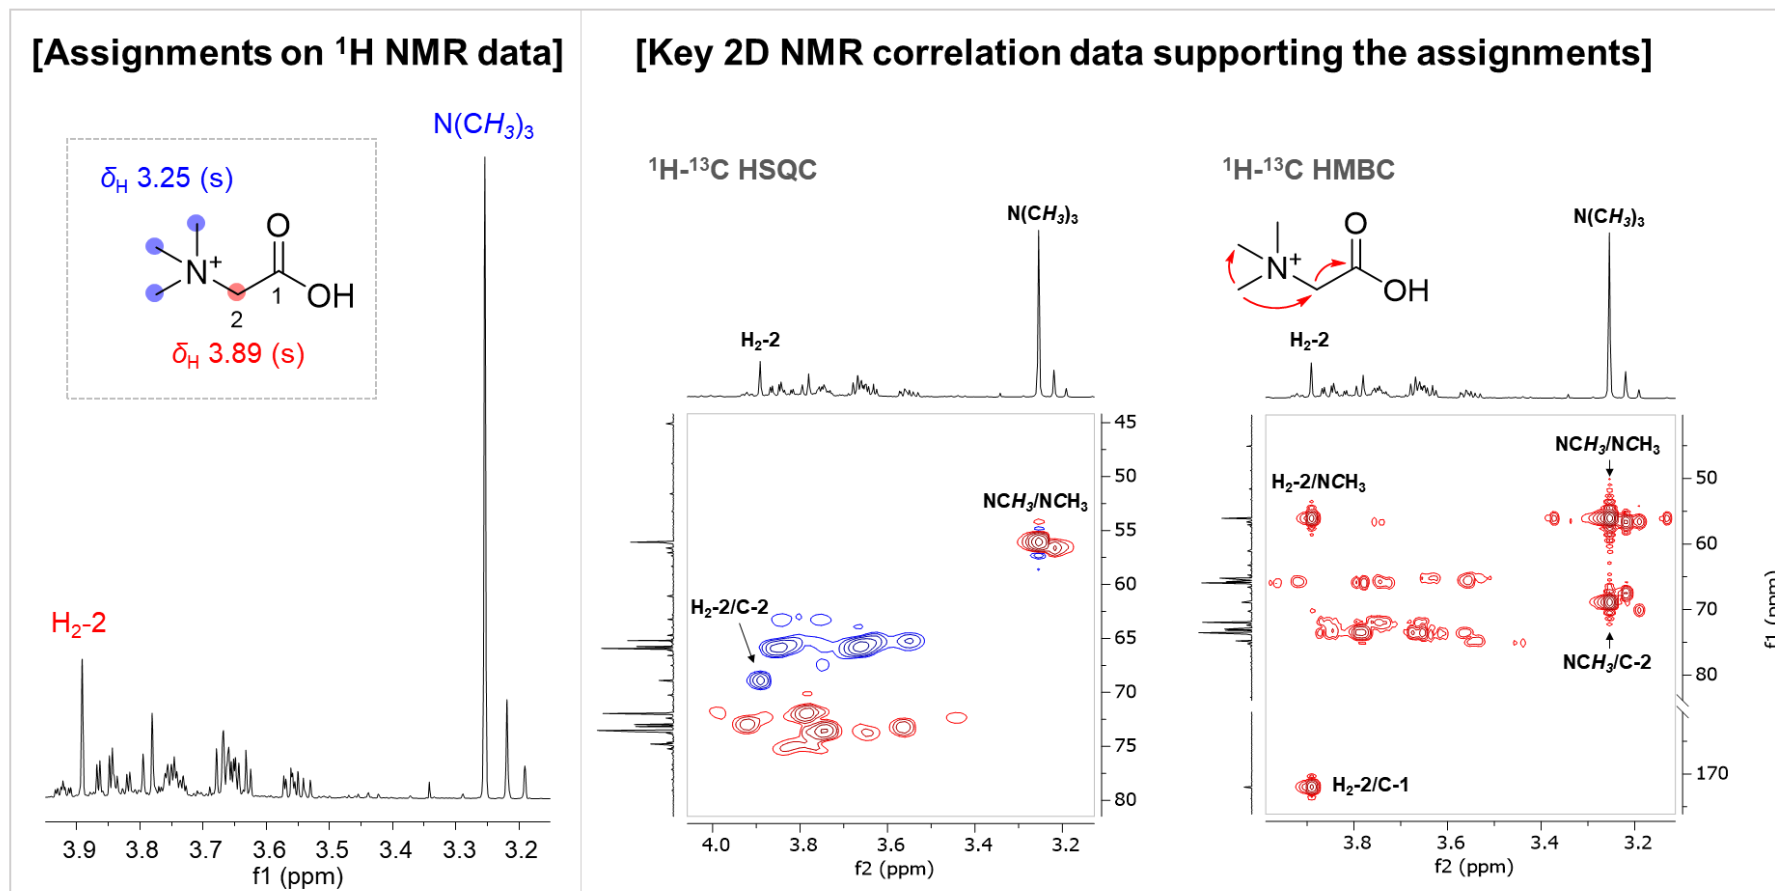

Biological Magnetic Resonance Data Bank (BMRB) code: bmse000069

Supplementary Figure 11. Detailed 2D NMR (600 MHz,  $\text{D}_2\text{O}$ ) data analysis of betaine (Bt) in PWB



# Choline sulfate (CS)

PWB

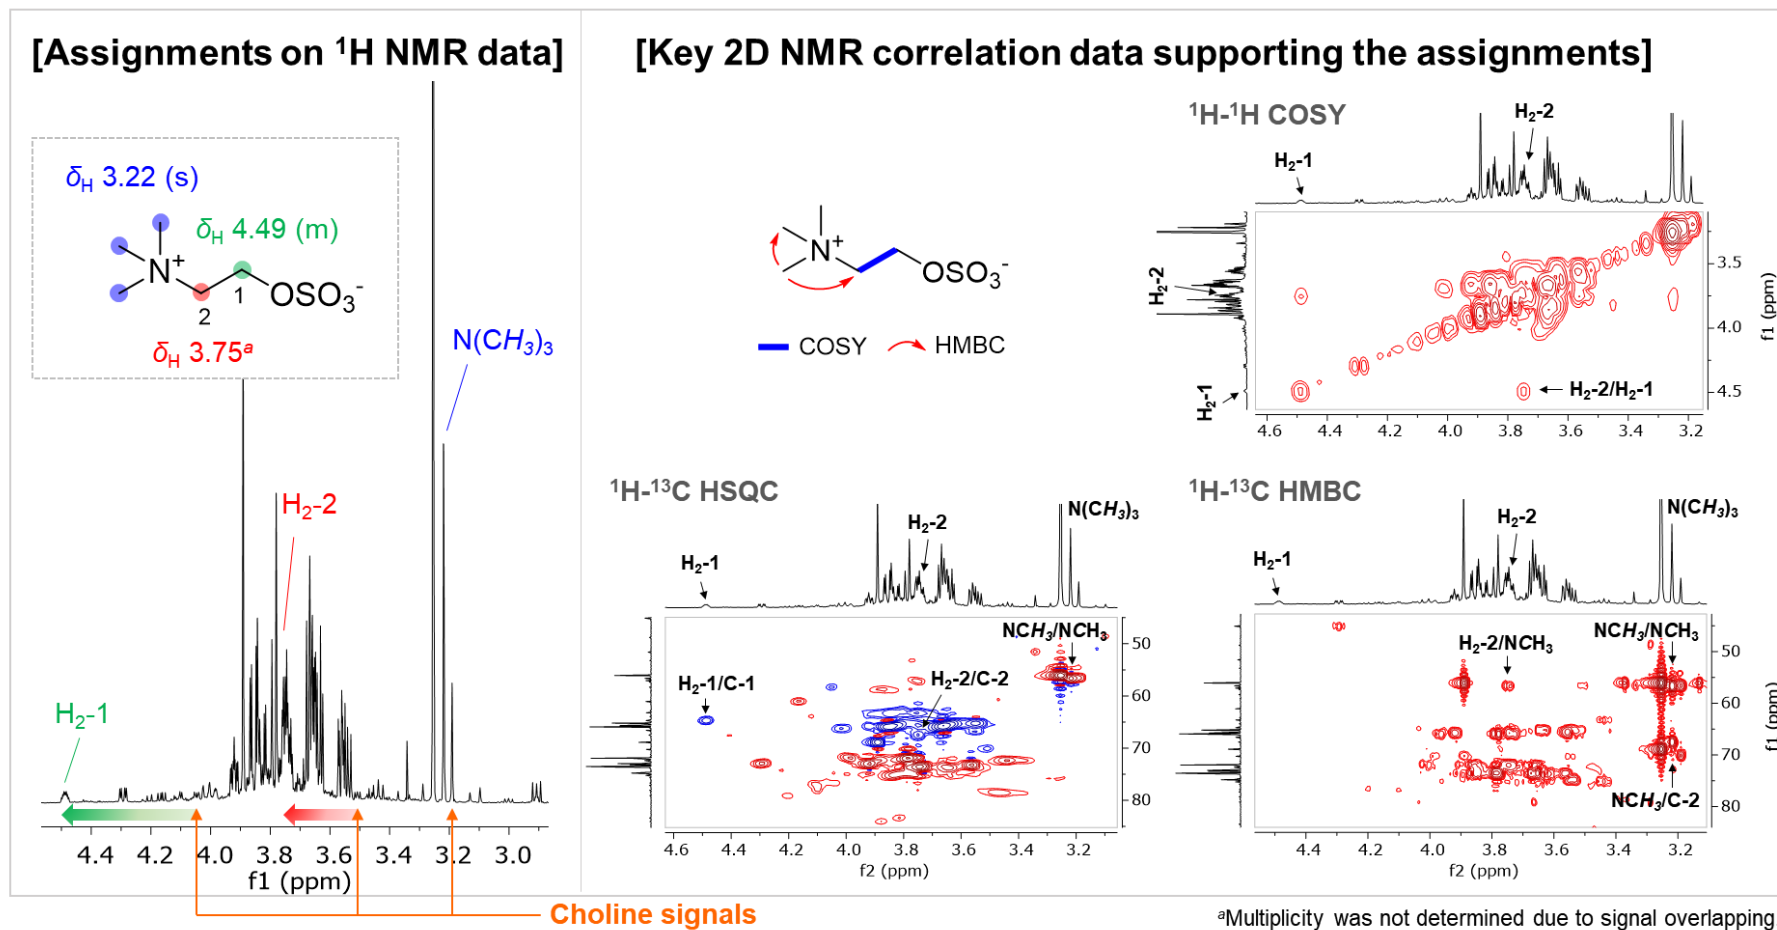

Supplementary Figure 12. Detailed 2D NMR (600 MHz,  $\text{D}_2\text{O}$ ) data analysis of choline sulfate (CS) in PWB

# Choline (Cho)

PWB

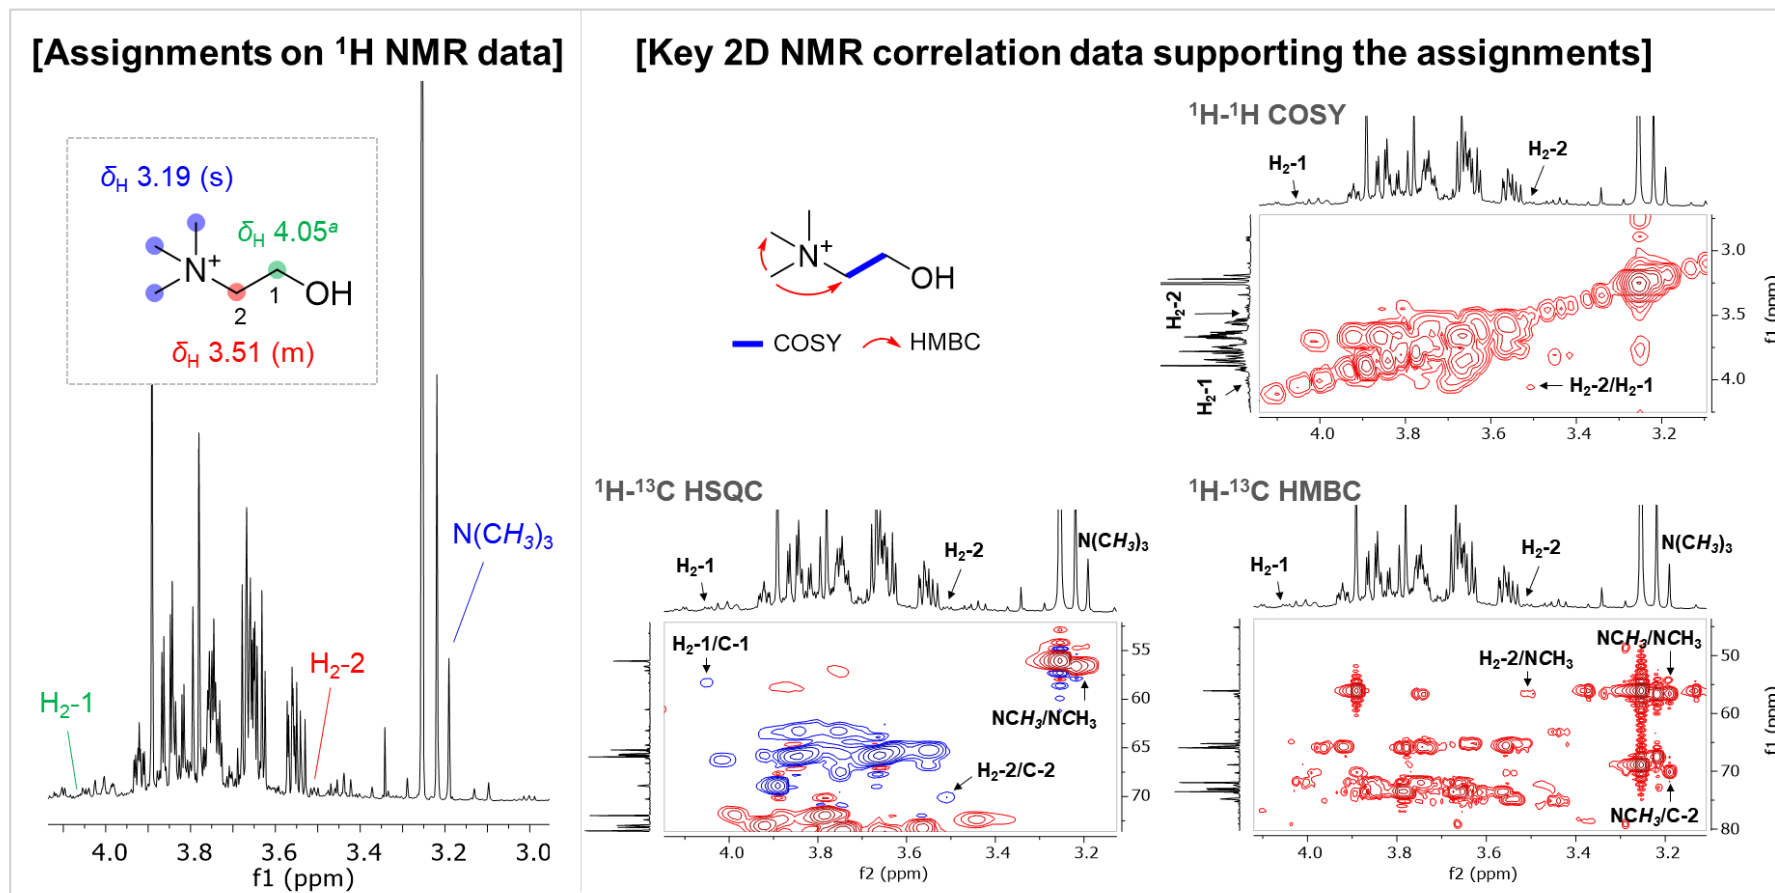

<sup>a</sup>Multiplicity was not determined due to signal overlapping.

Biological Magnetic Resonance Data Bank (BMRB) code: bmse000285

Supplementary Figure 13. Detailed 2D NMR (600 MHz, D<sub>2</sub>O) data analysis of choline (Cho) in PWB

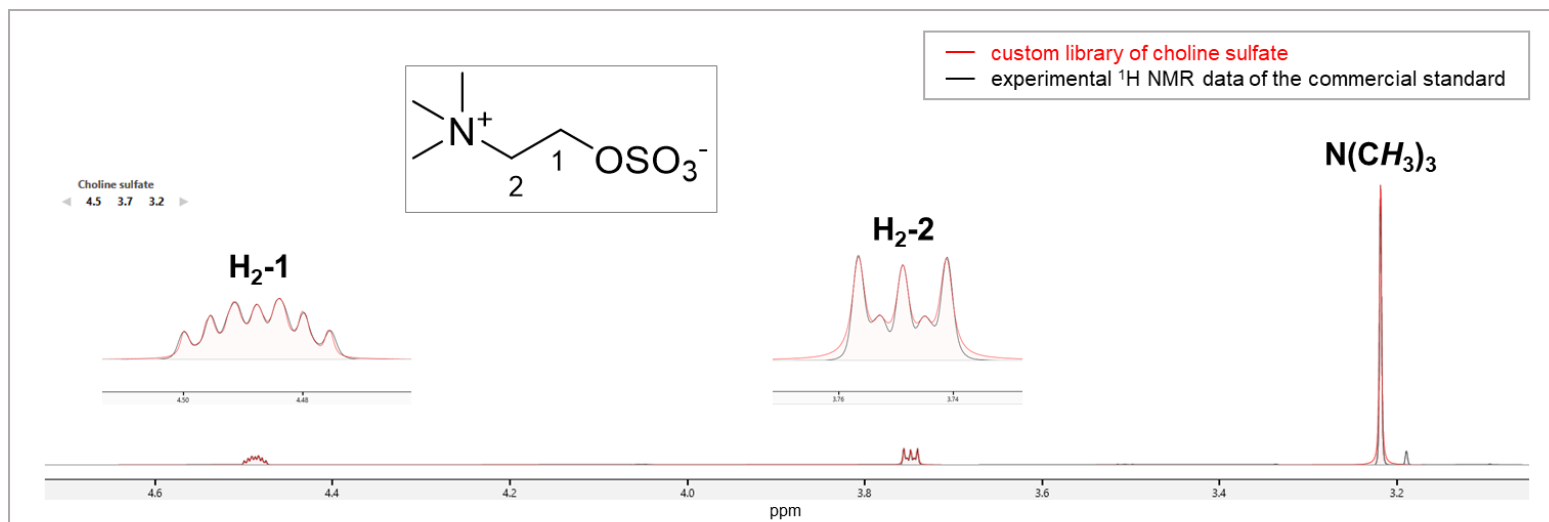

- **Sample information:** 2.00 mg/mL D<sub>2</sub>O solution (10.7 mM of choline sulfate of 98% standard sample purity)
- **<sup>1</sup>H NMR data acquisition parameter:** 1D NOESY presat pulse sequence (noesypr1d; presaturation frequency,  $\delta_H$  4.70 ppm) calibrated 90 degrees pulse (P1), D1 2 s, AQ 4 s, RG 64; NS 64; DS 2
- **<sup>1</sup>H NMR data processing parameter:** Fifth-order polynomial fitting, Lorentzian-to-Gaussian apodization (exponential factor -0.3, Gaussian factor 0.05)

\* The prepared custom Chemomx compound library is provided as xcpd file. Please cite this paper for use.

**Supplementary Figure 14.** Preparation of the custom compound library for choline sulfate

**(A)**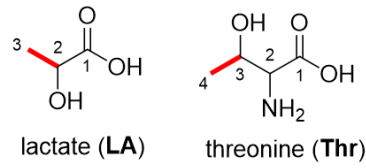**PWB****Key  $^1\text{H}$ - $^1\text{H}$  COSY NMR correlations**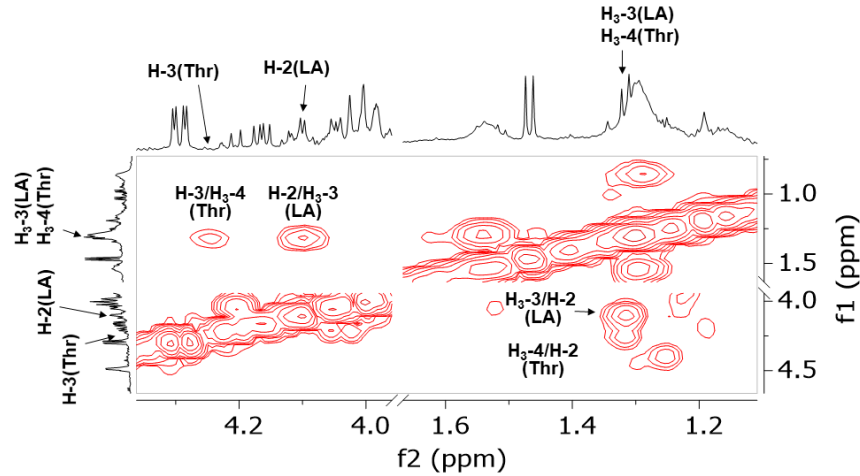**(B)**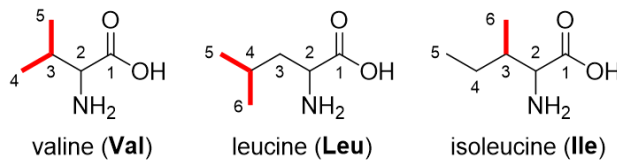**Key  $^1\text{H}$ - $^1\text{H}$  COSY NMR correlations**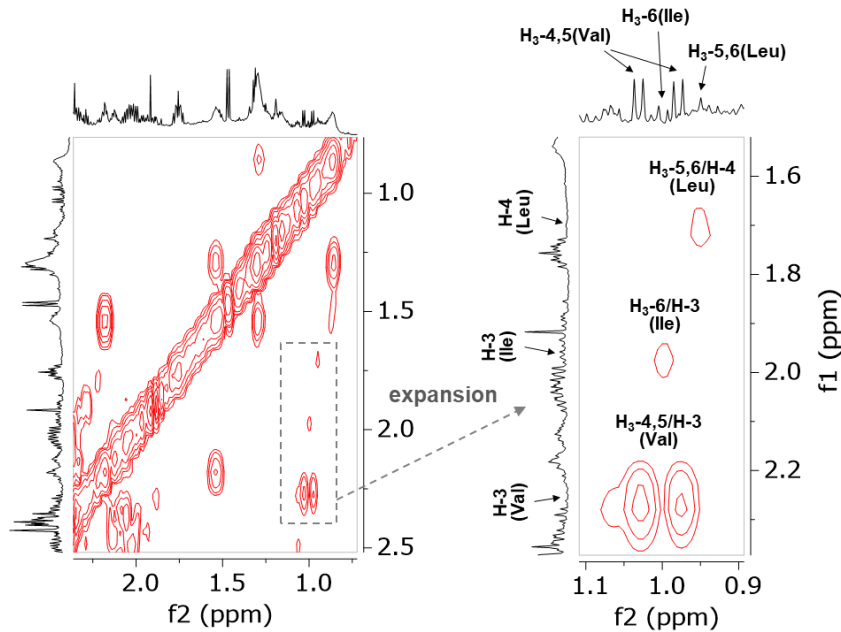

**Supplementary Figure 15.** Key  $^1\text{H}$ - $^1\text{H}$  COSY (600 MHz,  $\text{D}_2\text{O}$ ) correlations for identification of (A) lactate (LA) and threonine (Thr), and (B) valine (Val), leucine (Leu), and isoleucine (Ile) in **PWB**



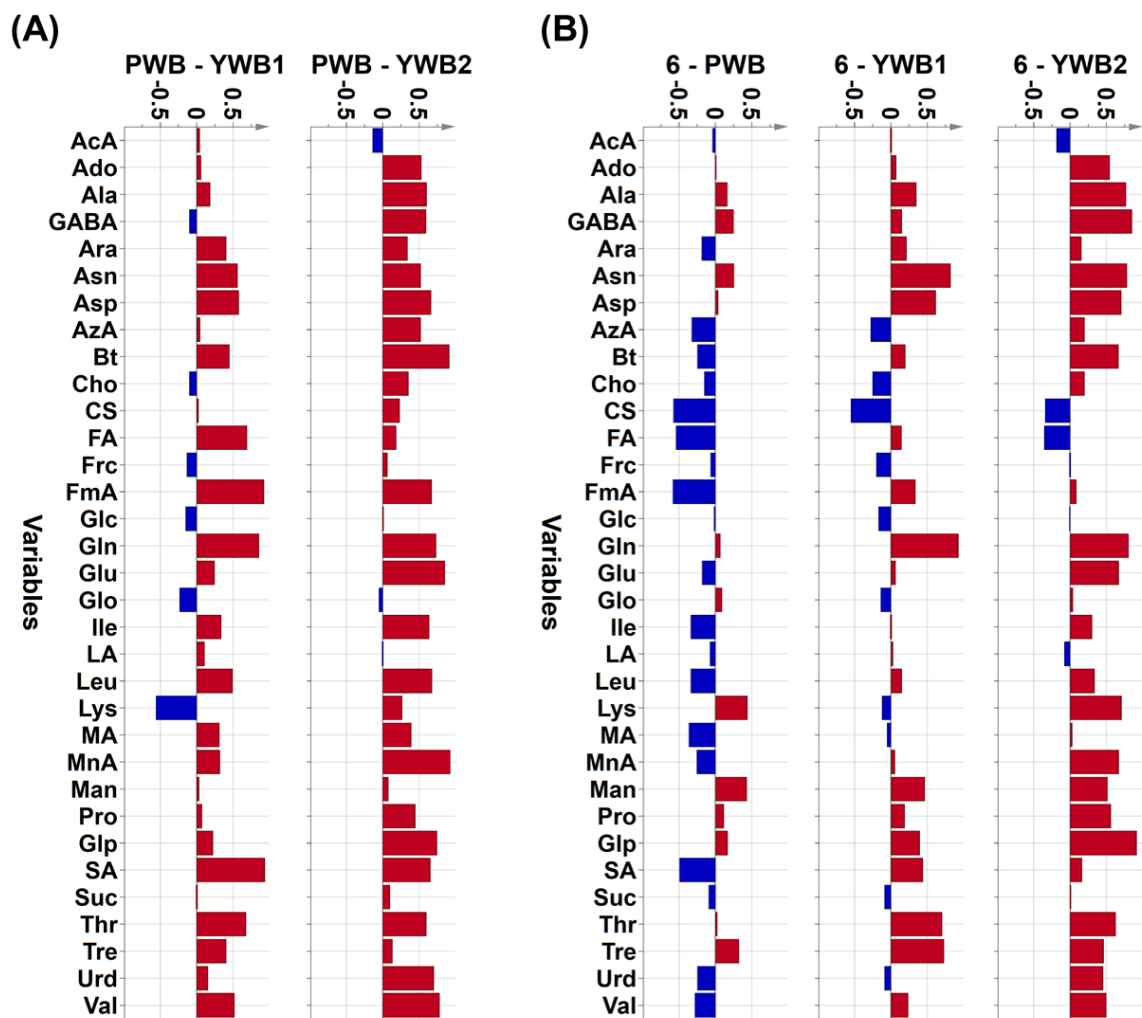

**Supplementary Figure 16.** Subtraction plots of (A) **PWB** with **YWB1** (left) or **YWB2** (right), and (B) **PWB6** with **PWB**, **YWB1**, or **YWB2** (left to right) for 33 variables (quantification data were rescaled by min-max normalization to [0, 1] for plotting; positive or negative values were colored red or blue, respectively)

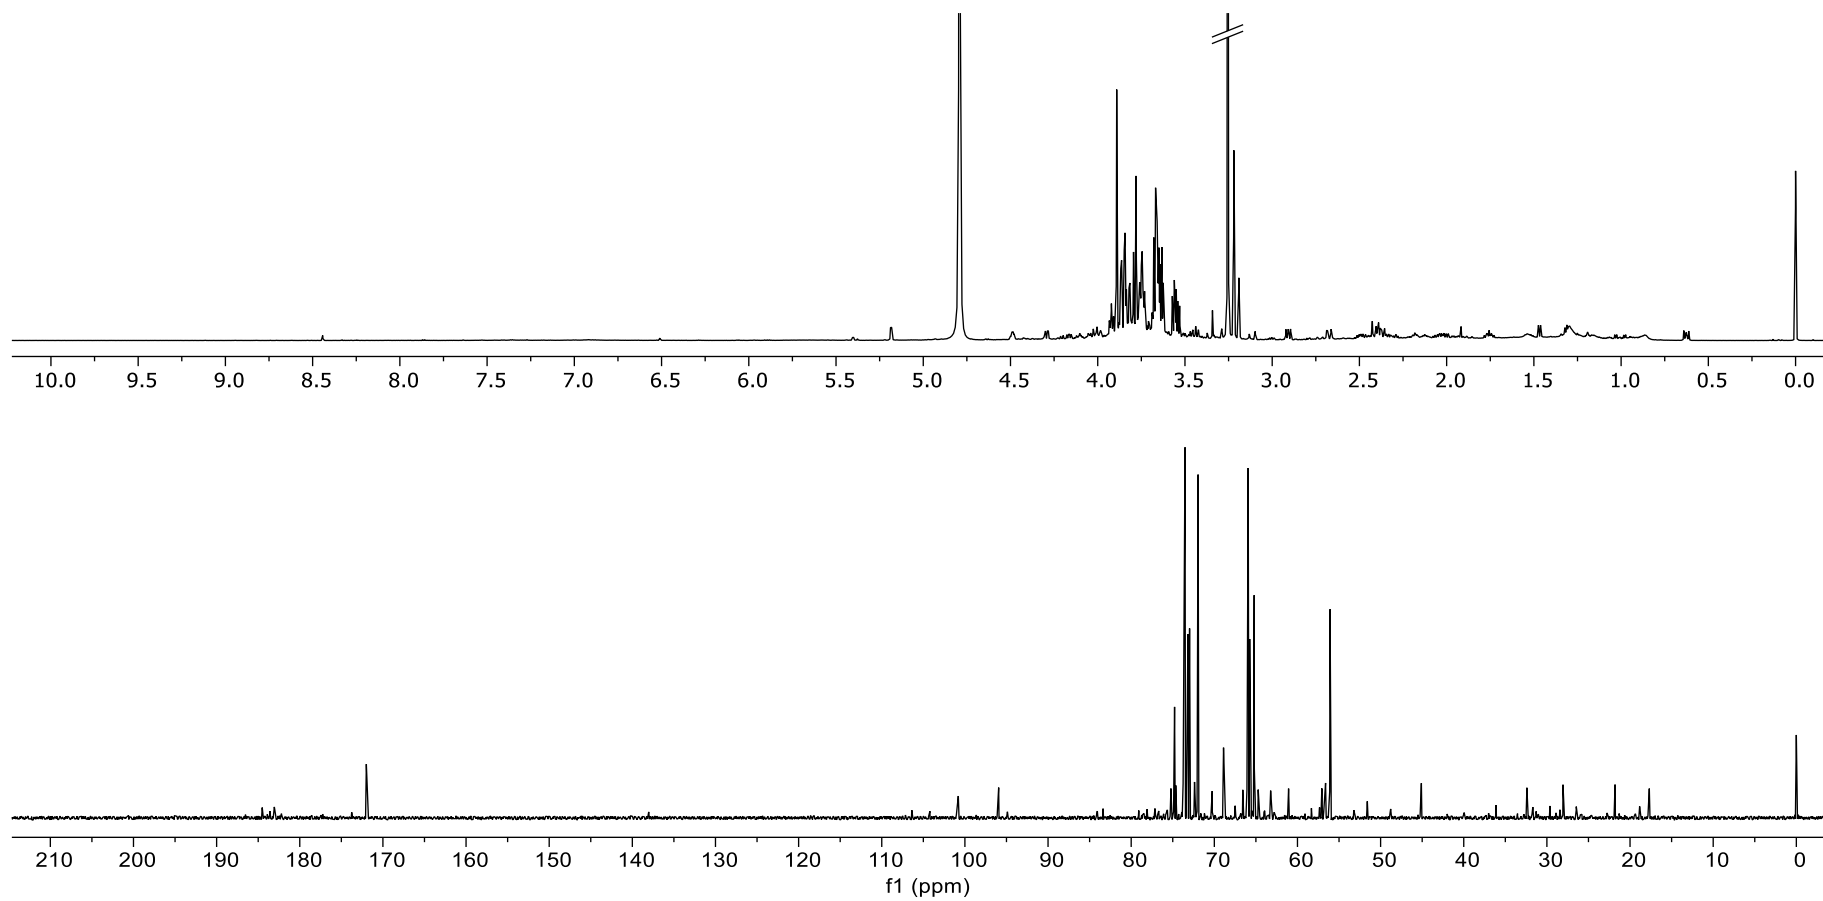

**Supplementary Figure 17.** <sup>1</sup>H (top, 600 MHz) and <sup>13</sup>C (bottom, 150 MHz) NMR spectra (D<sub>2</sub>O) of PWB

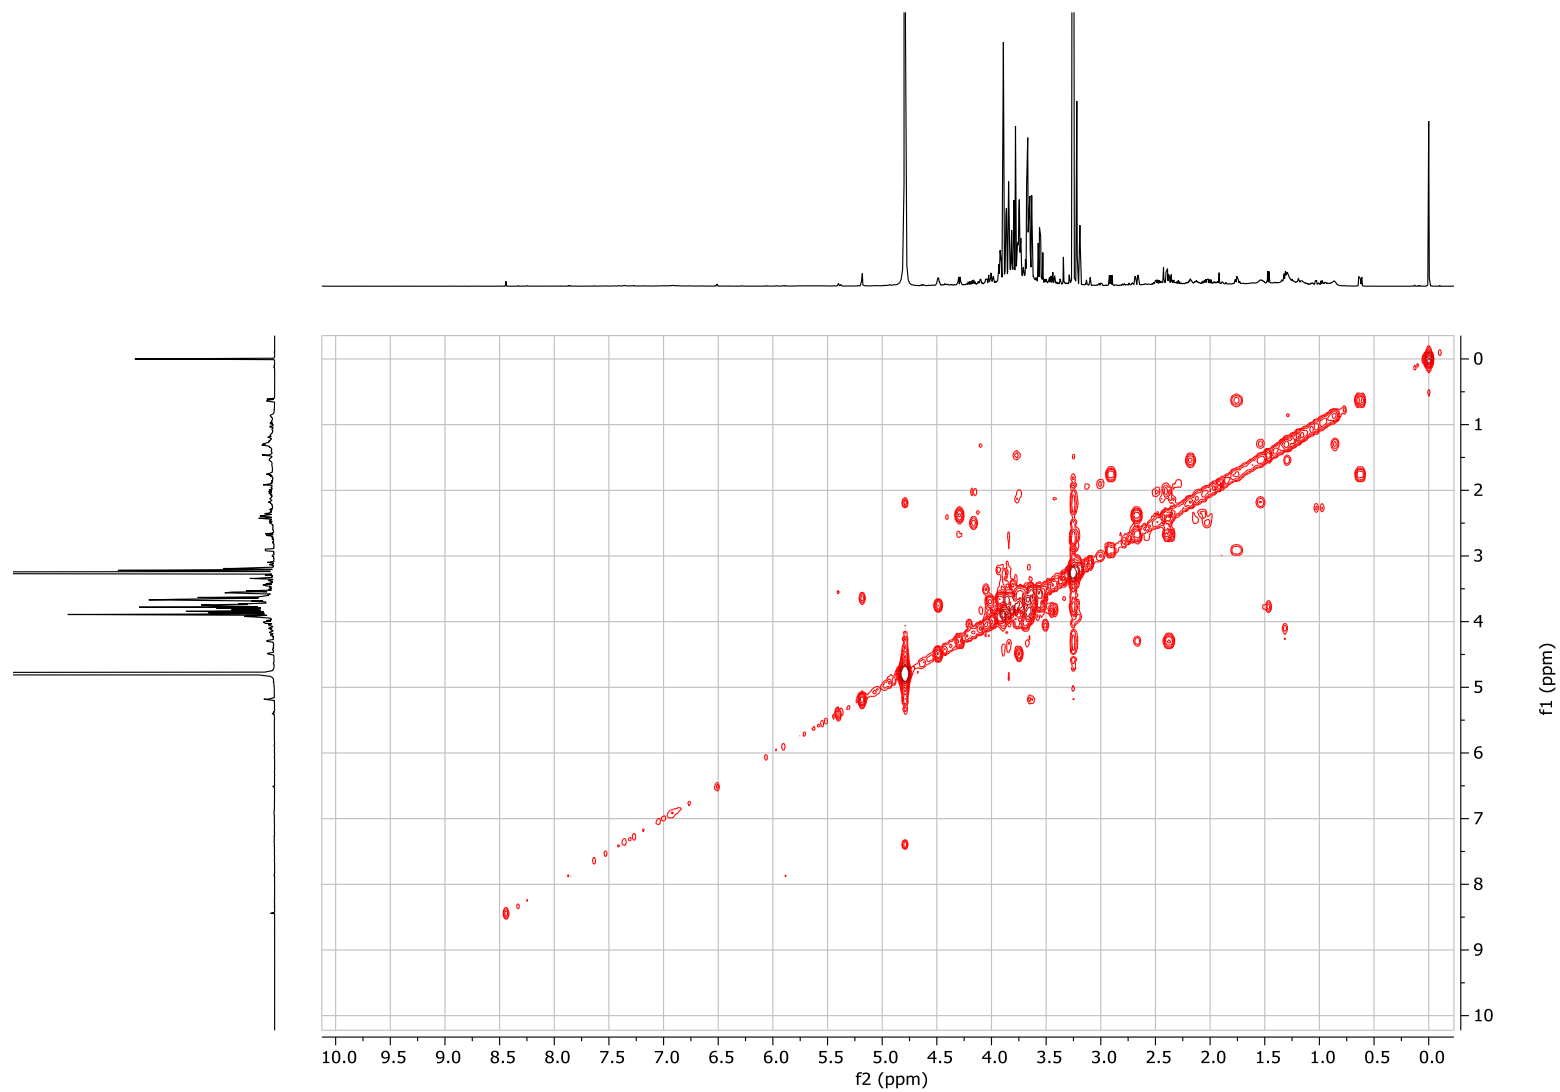

**Supplementary Figure 18.**  $^1\text{H}$ - $^1\text{H}$  COSY spectrum ( $\text{D}_2\text{O}$ ) of PWB



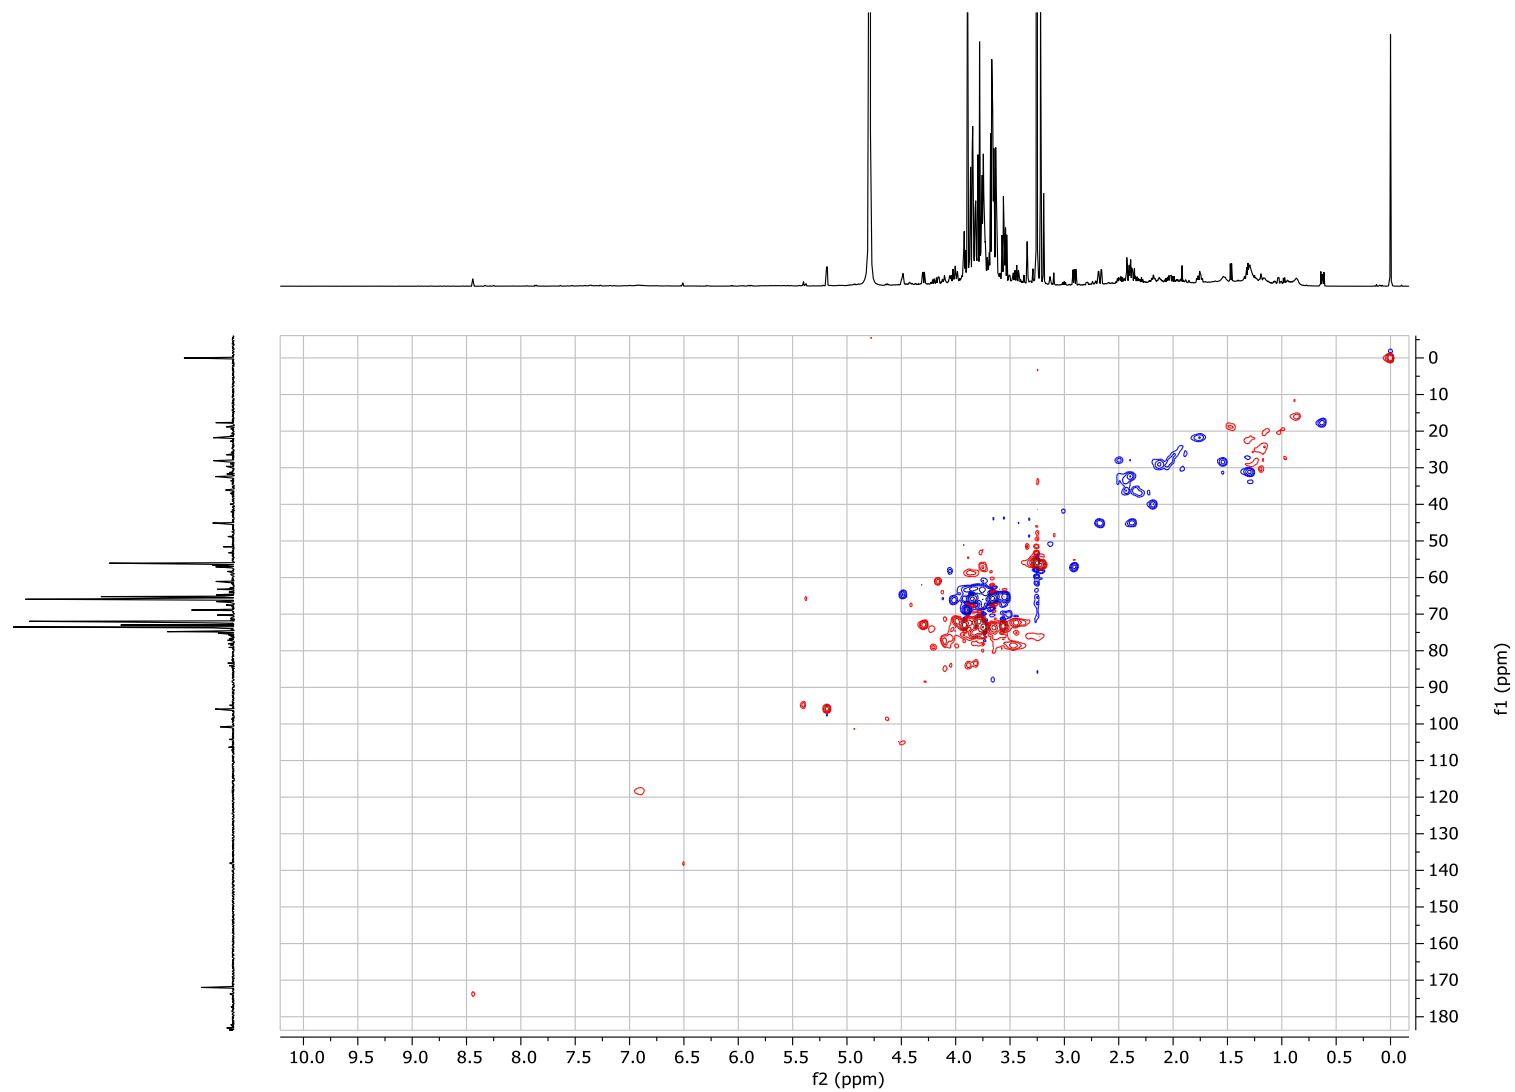

**Supplementary Figure 19.**  $^1\text{H}$ - $^{13}\text{C}$  HSQC spectrum ( $\text{D}_2\text{O}$ ) of PWB

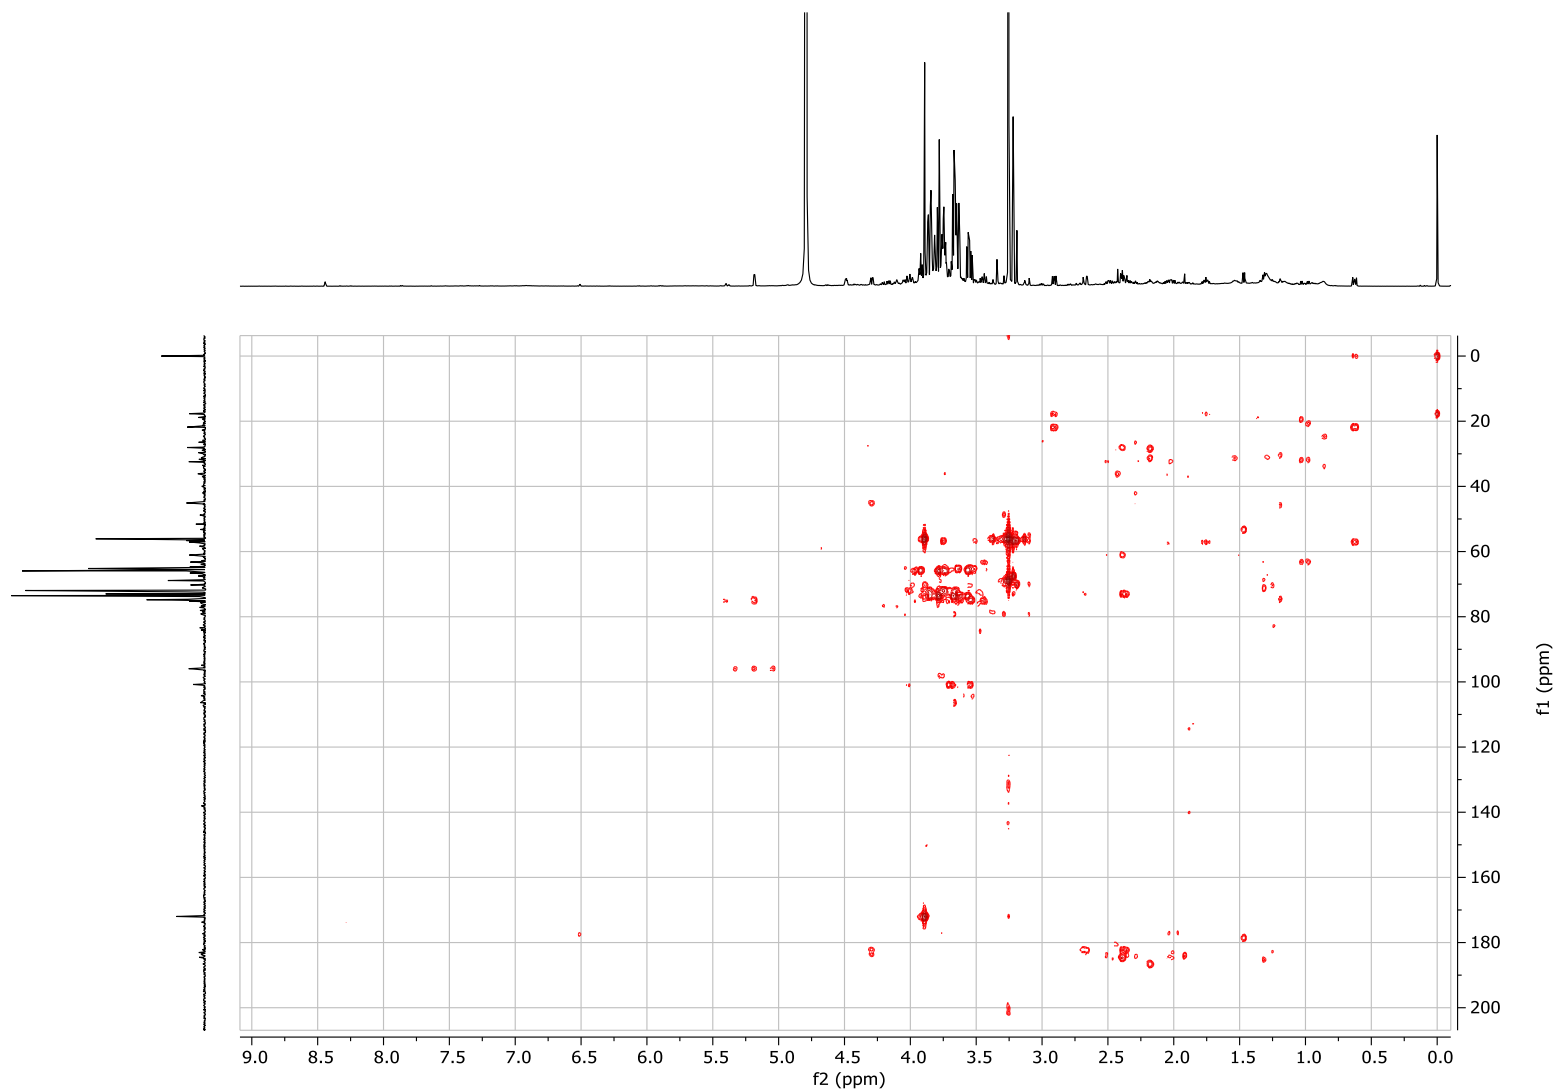

**Supplementary Figure 20.**  $^1\text{H}$ - $^{13}\text{C}$  HMBC spectrum ( $\text{D}_2\text{O}$ ) of **PWB**

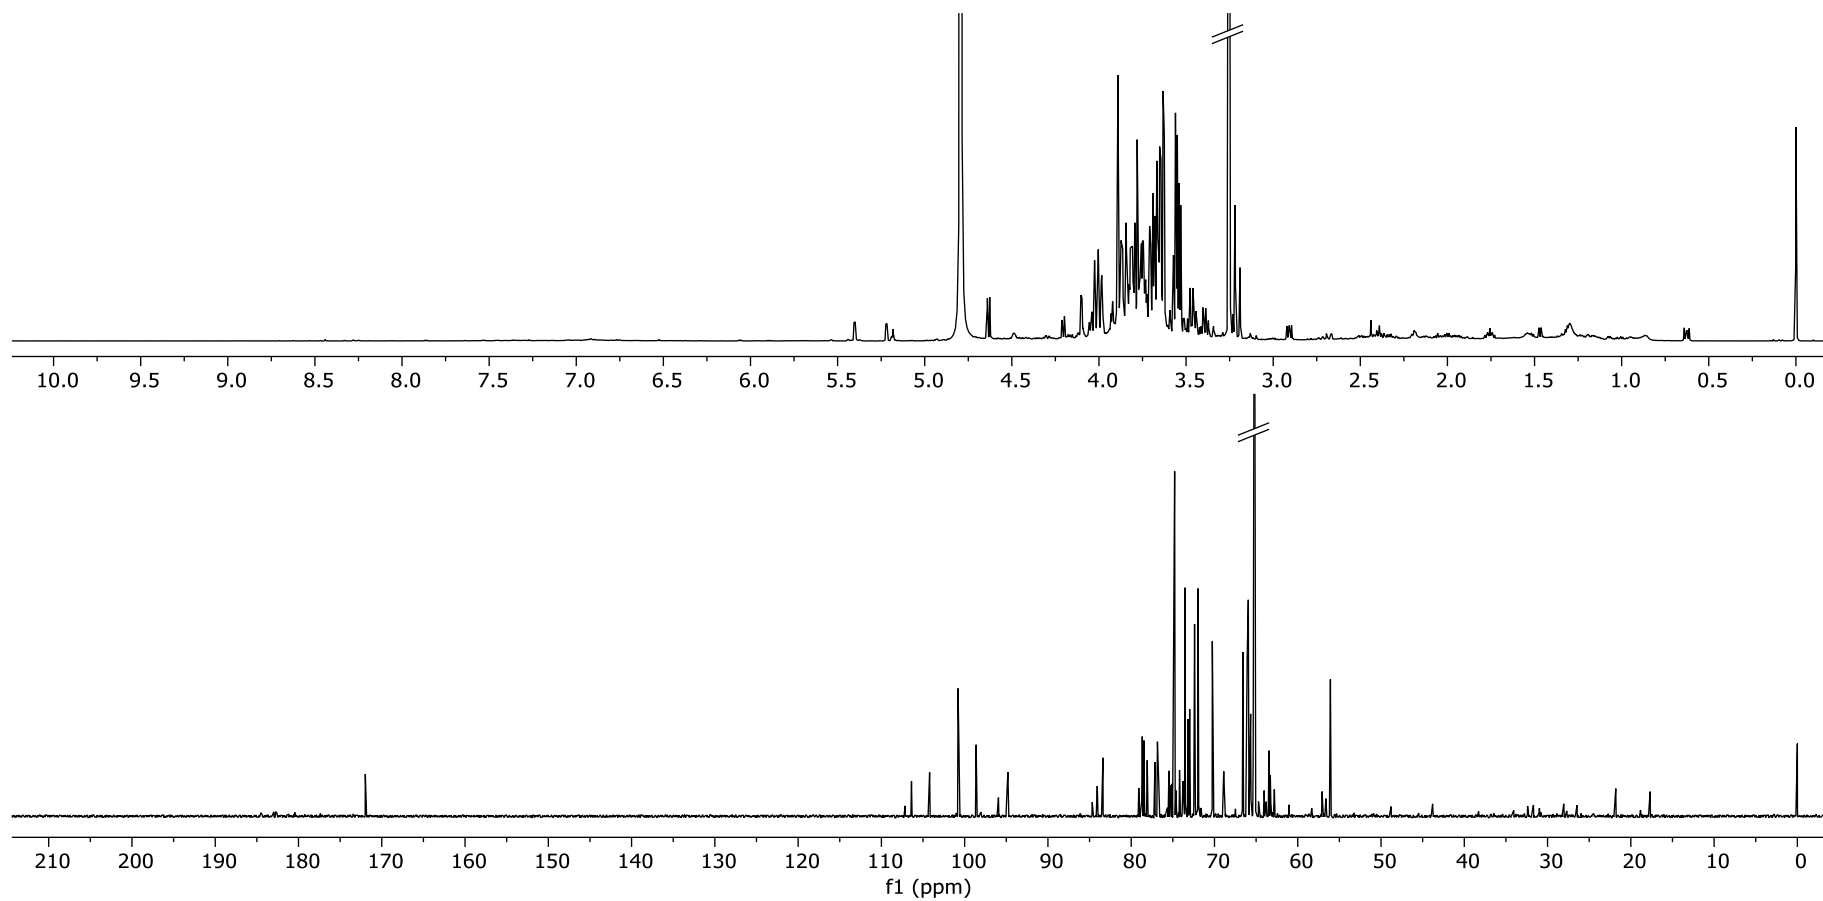

**Supplementary Figure 21.**  $^1\text{H}$  (top, 600 MHz) and  $^{13}\text{C}$  (bottom, 150 MHz) NMR spectra ( $\text{D}_2\text{O}$ ) of PWBr3

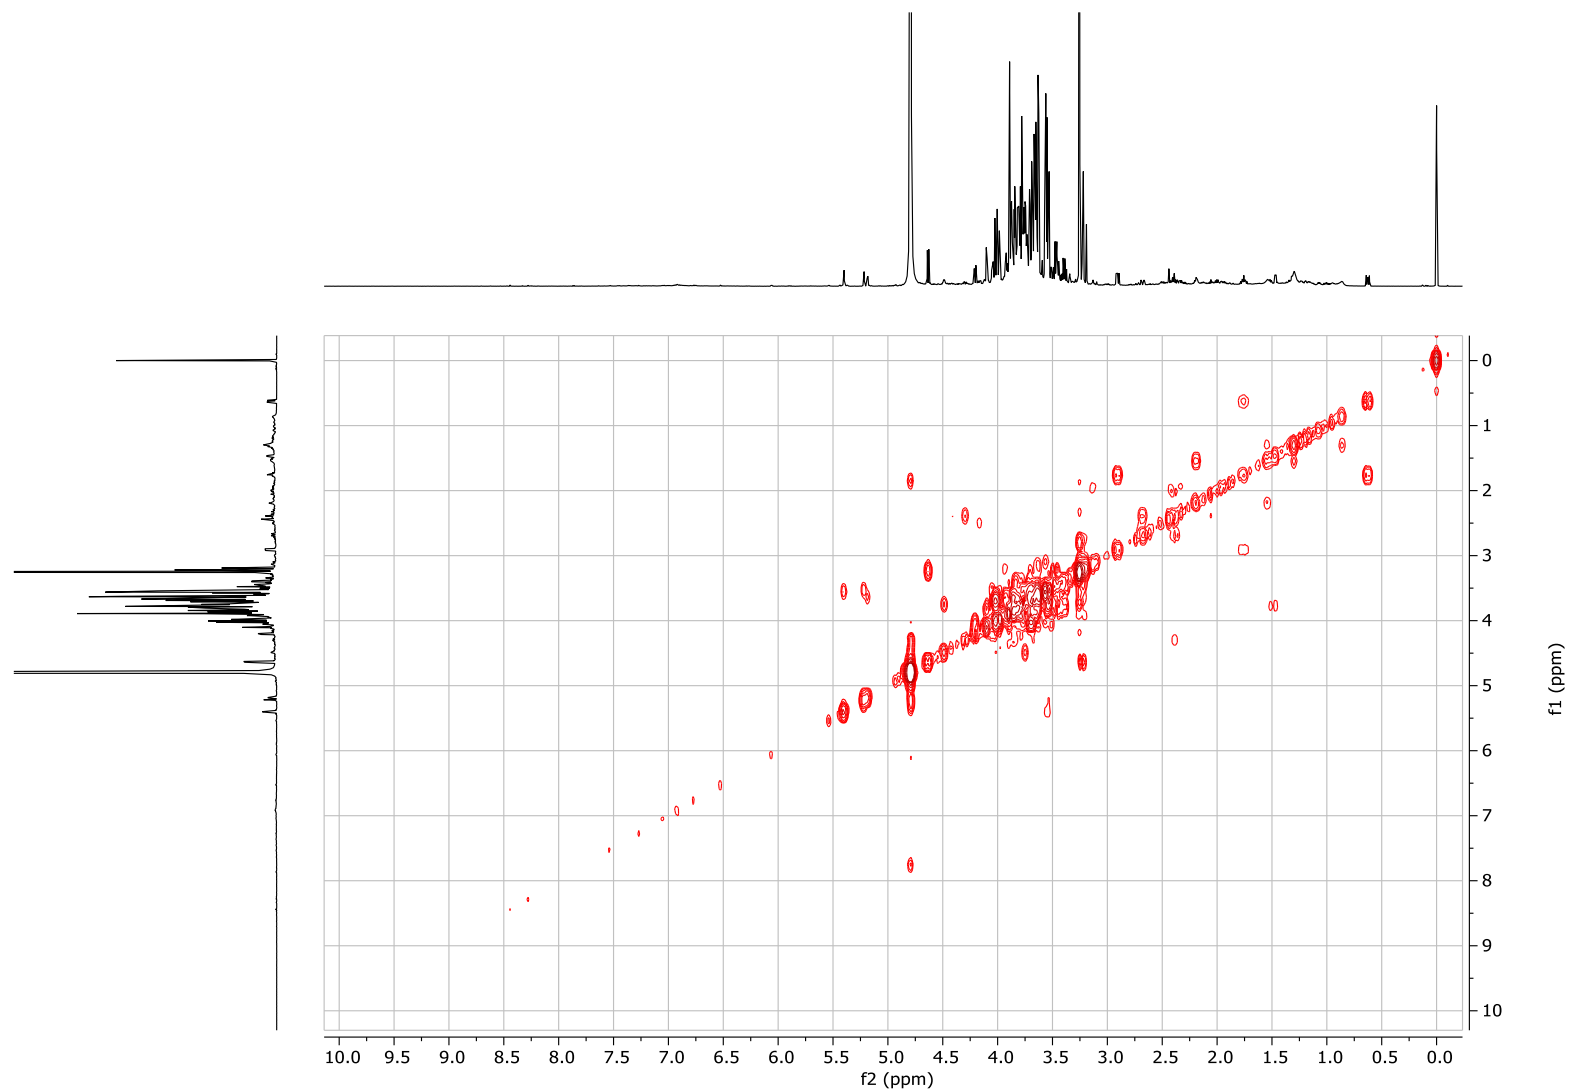

**Supplementary Figure 22.**  $^1\text{H}$ - $^1\text{H}$  COSY spectrum ( $\text{D}_2\text{O}$ ) of **PWBr3**

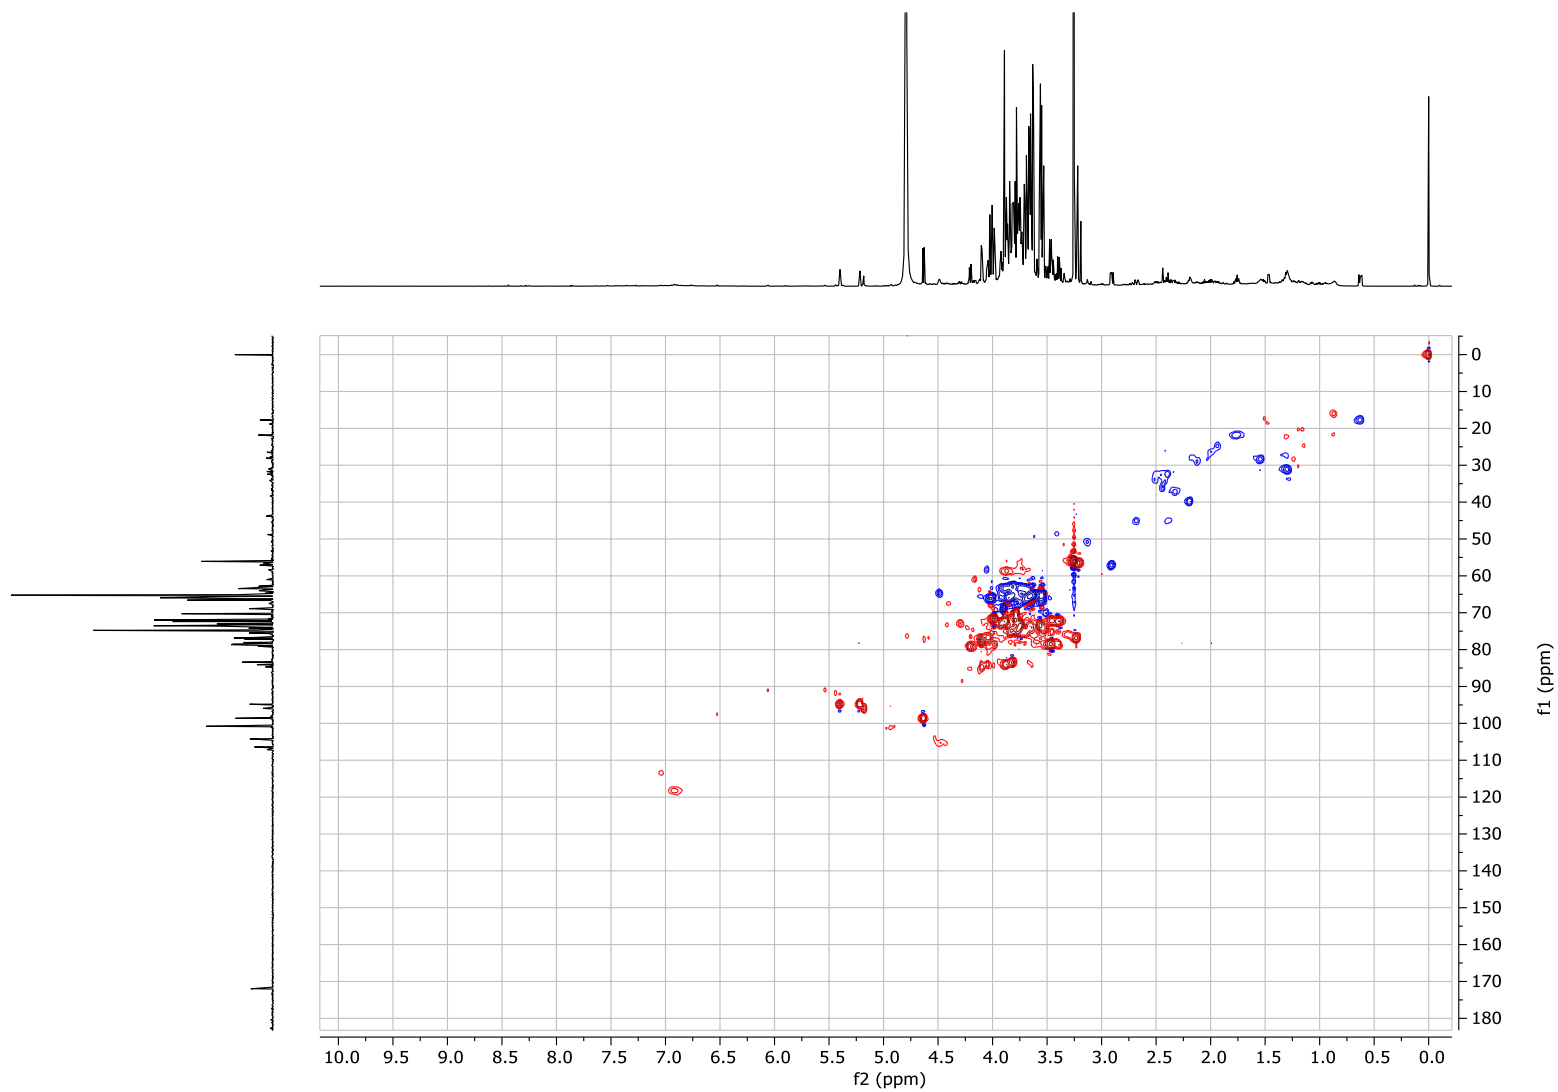

**Supplementary Figure 23.**  $^1\text{H}$ - $^{13}\text{C}$  HSQC spectrum (D<sub>2</sub>O) of PWBr<sub>3</sub>

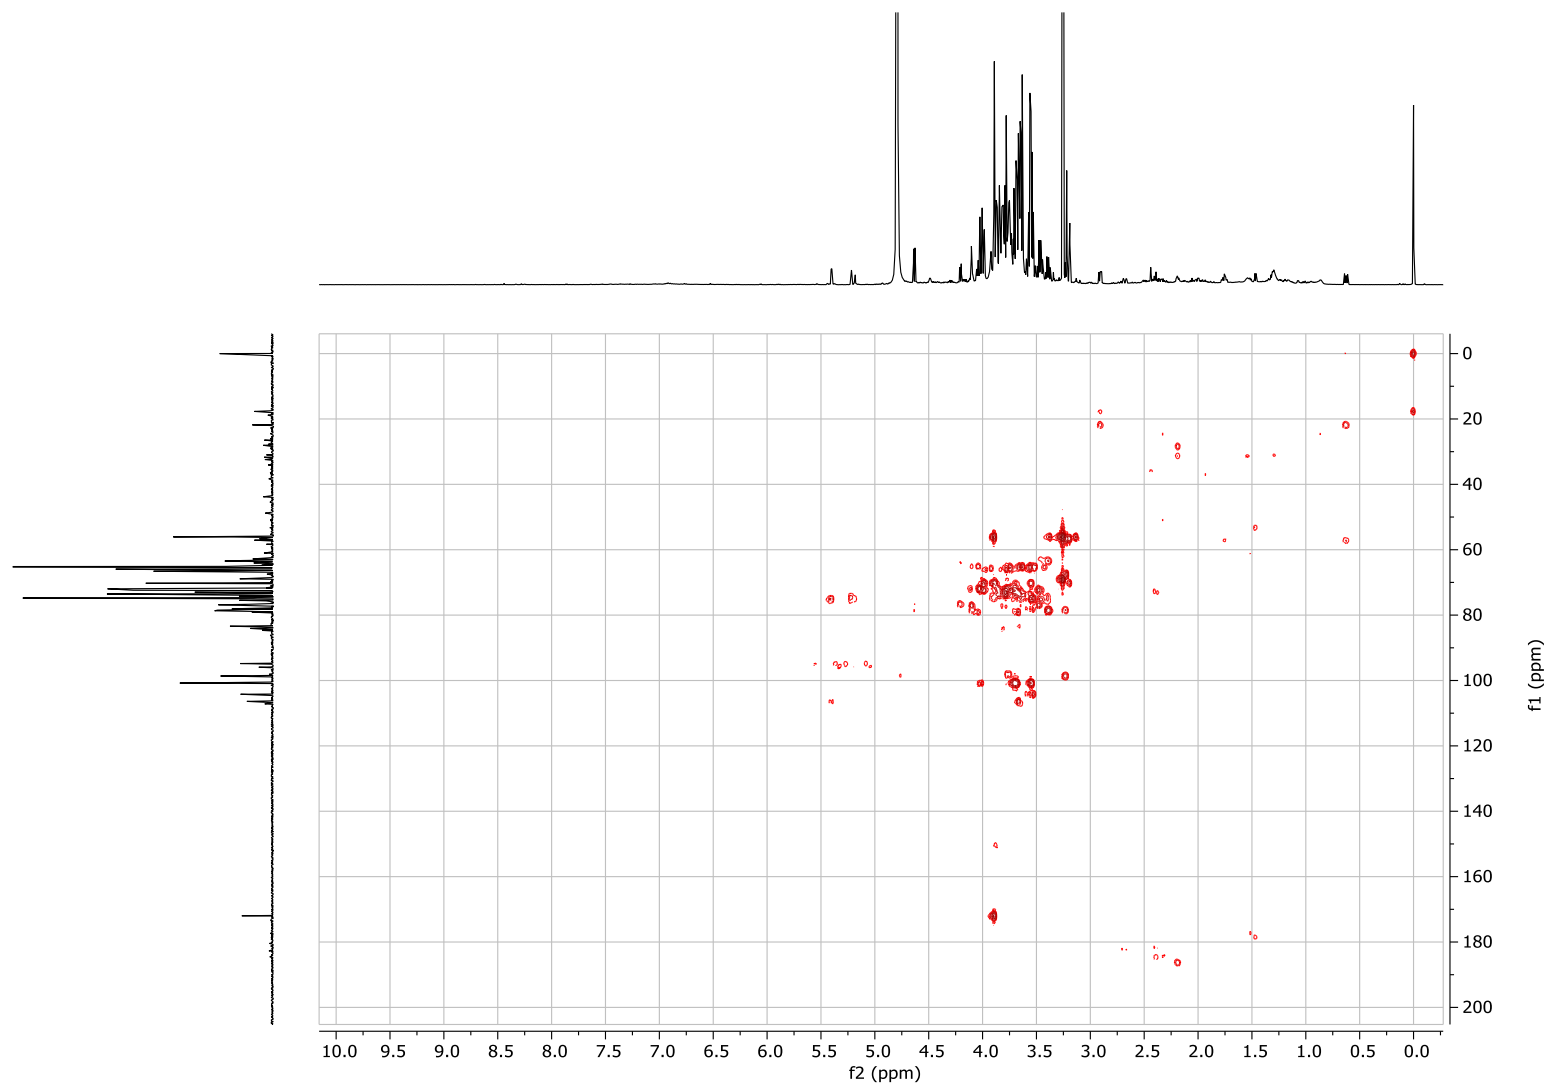

Supplementary Figure 24.  $^1\text{H}$ - $^{13}\text{C}$  HMBC spectrum (D<sub>2</sub>O) of PWBr<sub>3</sub>

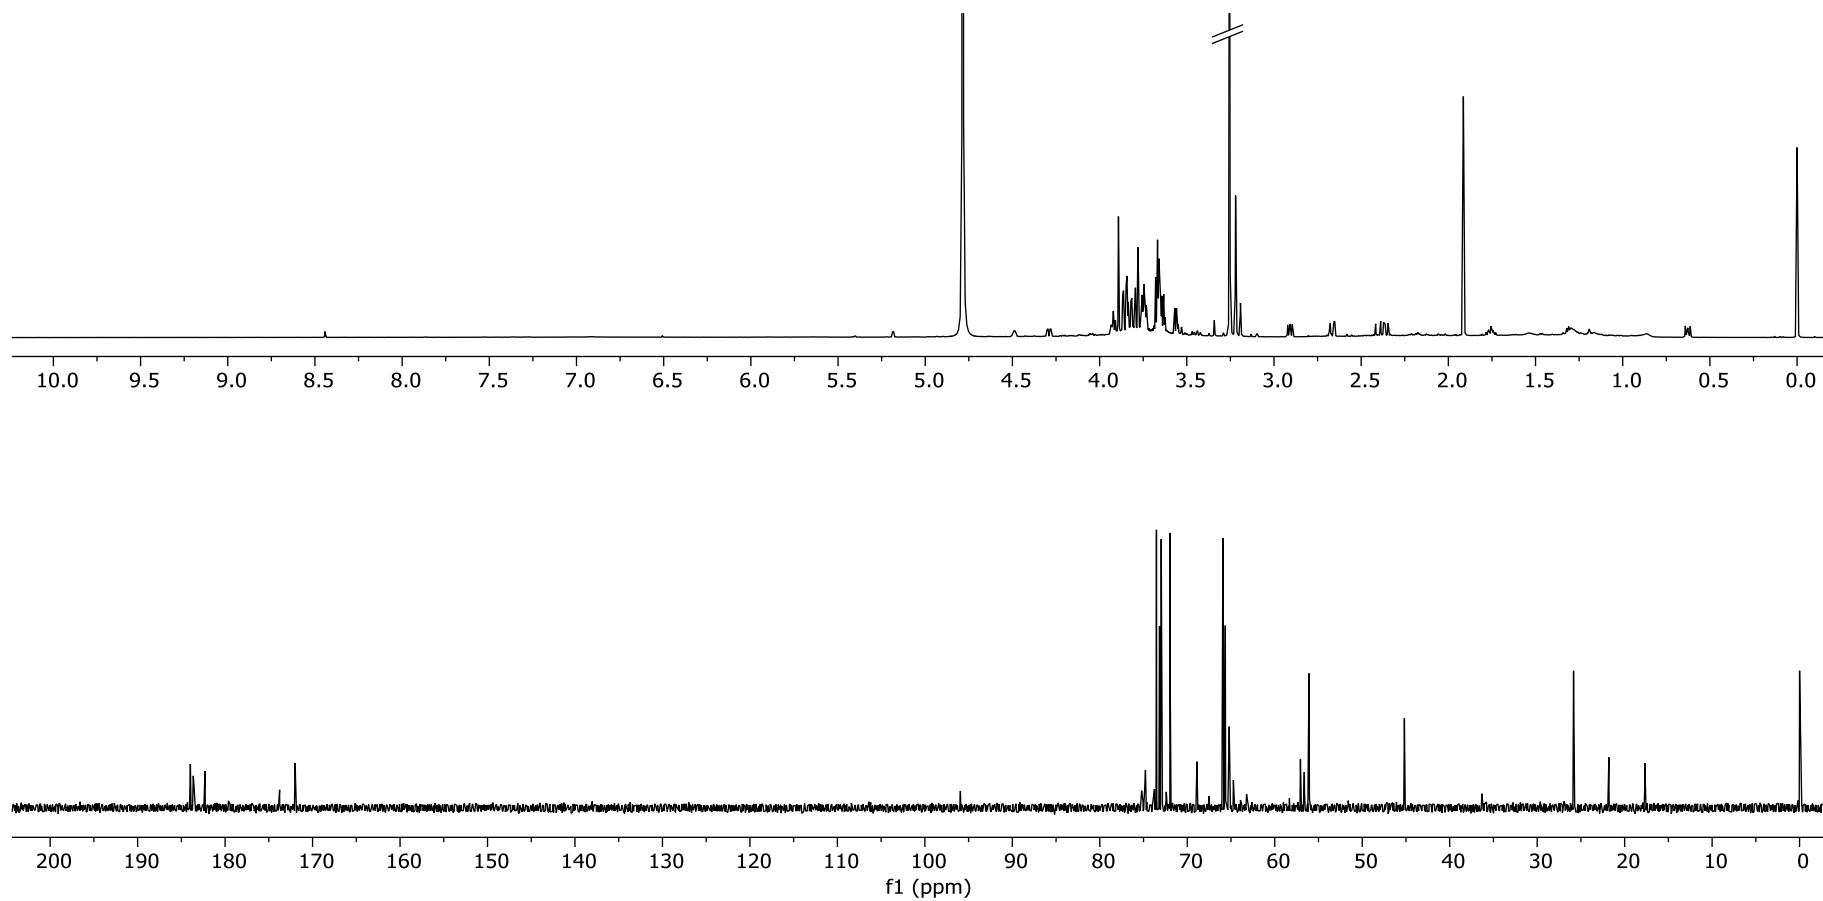

**Supplementary Figure 25.** <sup>1</sup>H (top, 600 MHz) and <sup>13</sup>C (bottom, 150 MHz) NMR spectra (D<sub>2</sub>O) of PWB19

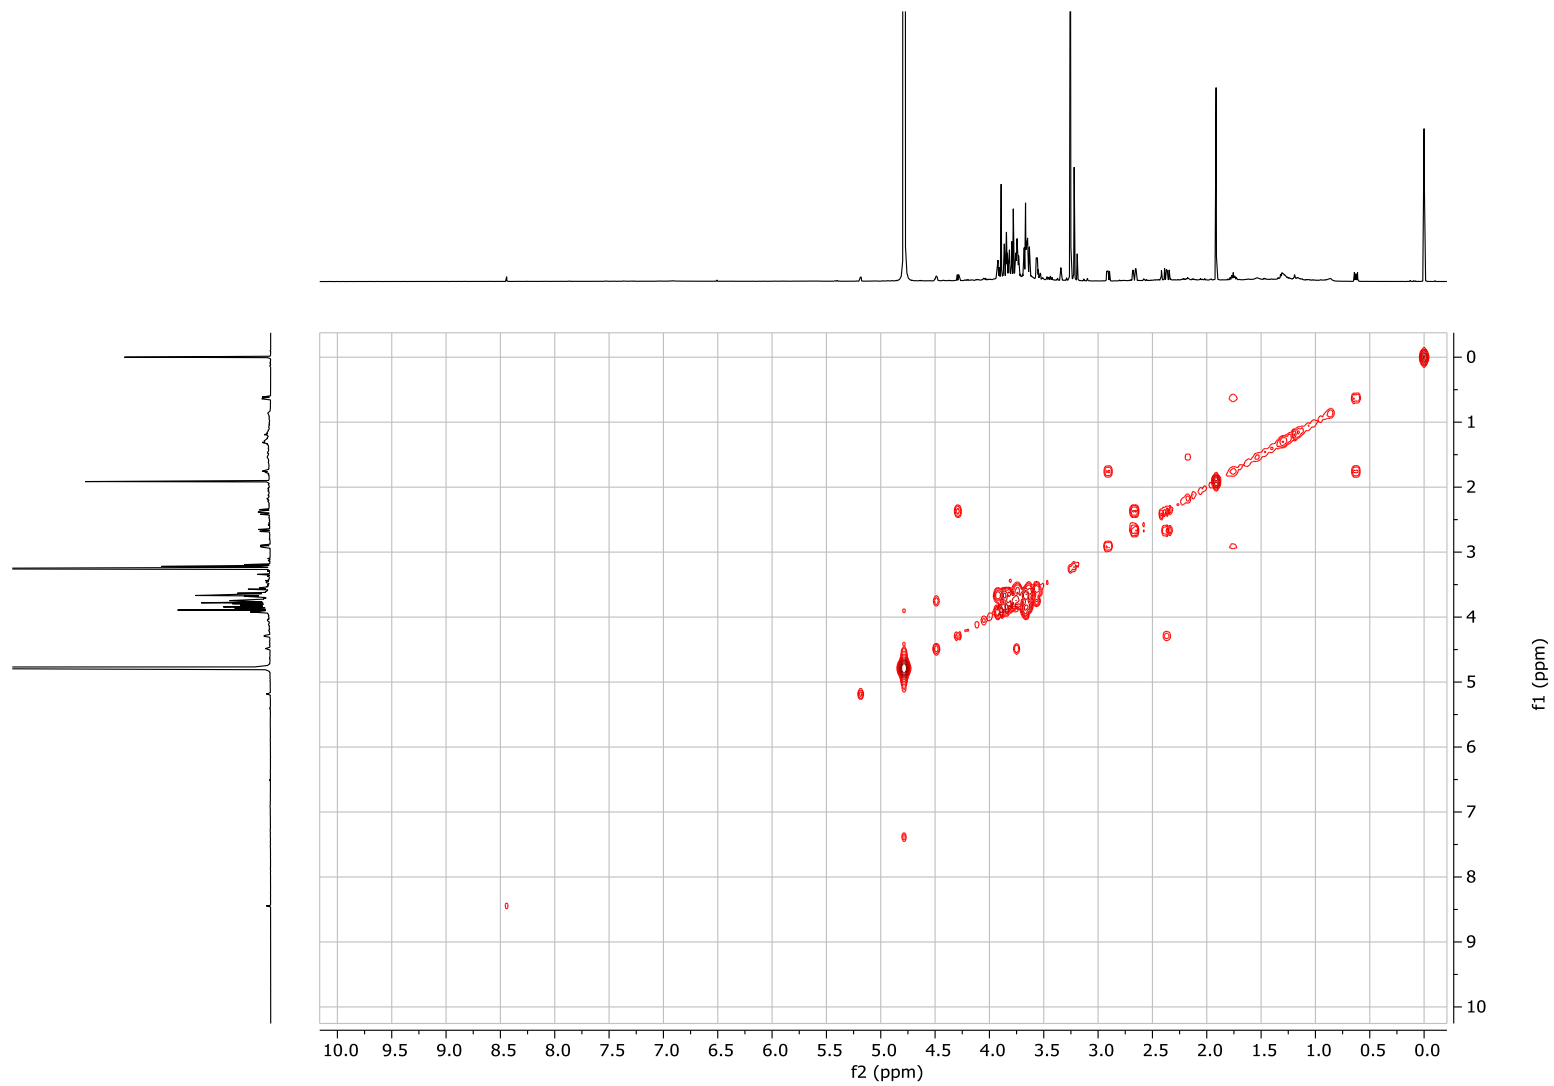

Supplementary Figure 26.  $^1\text{H}$ - $^1\text{H}$  COSY spectrum ( $\text{D}_2\text{O}$ ) of PWBr19



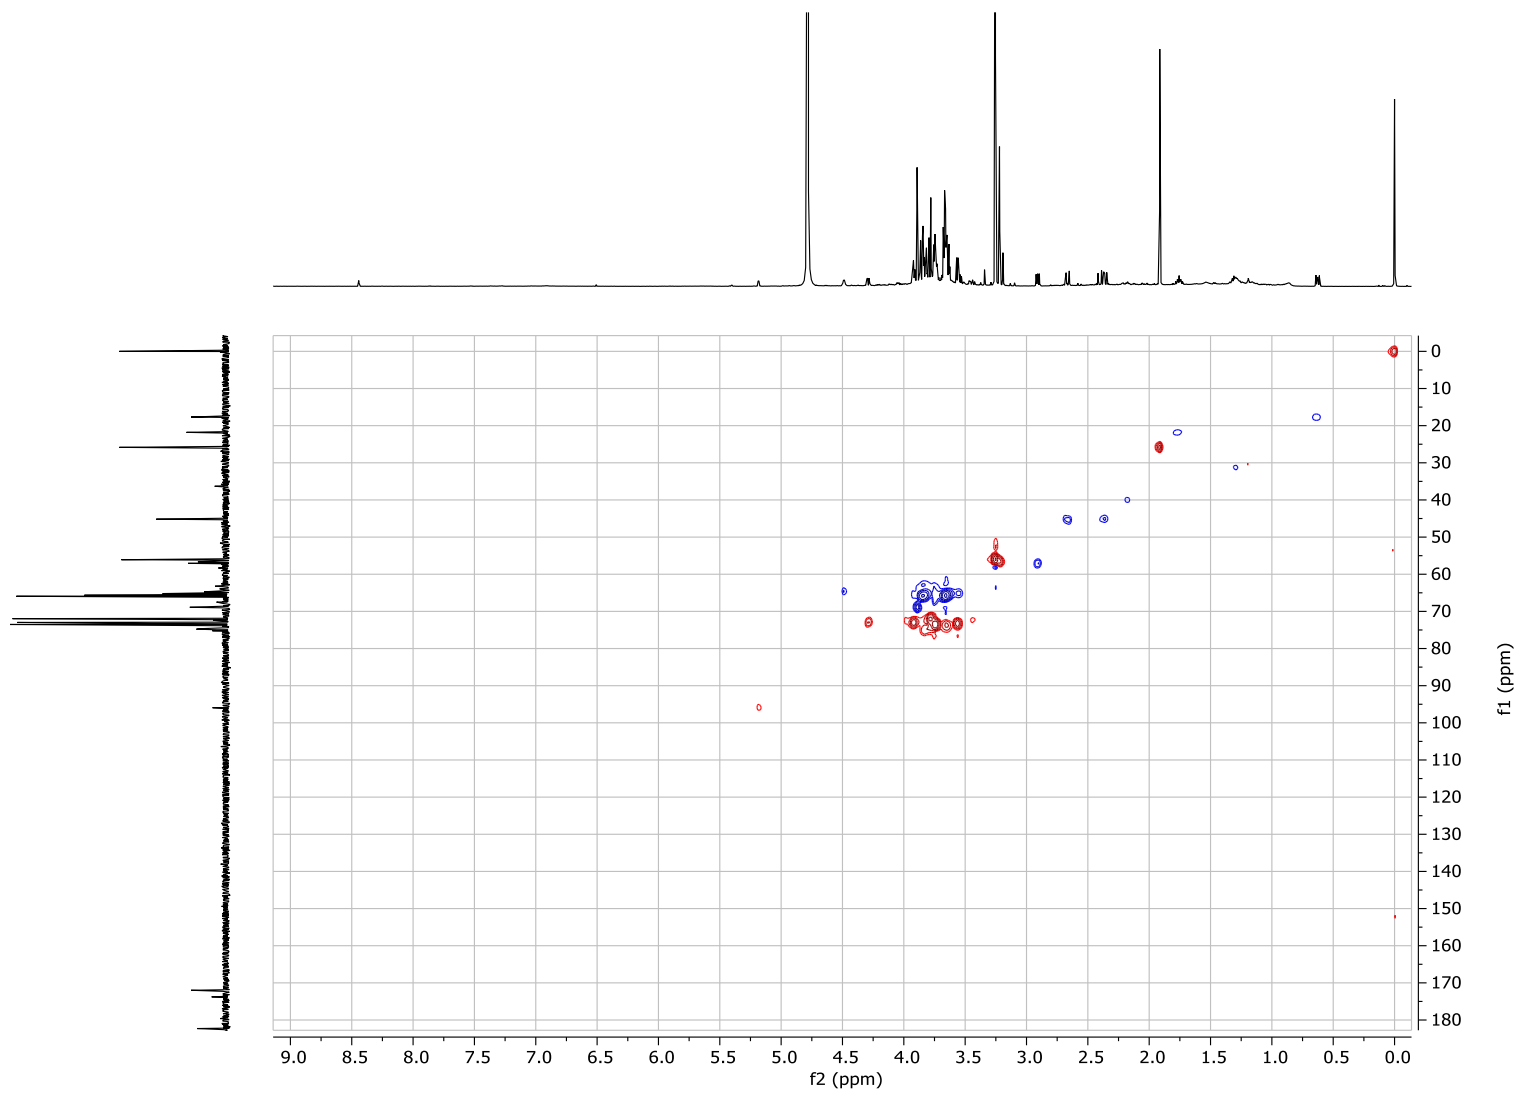

Supplementary Figure 27.  $^1\text{H}$ - $^{13}\text{C}$  HSQC spectrum ( $\text{D}_2\text{O}$ ) of PWBr19

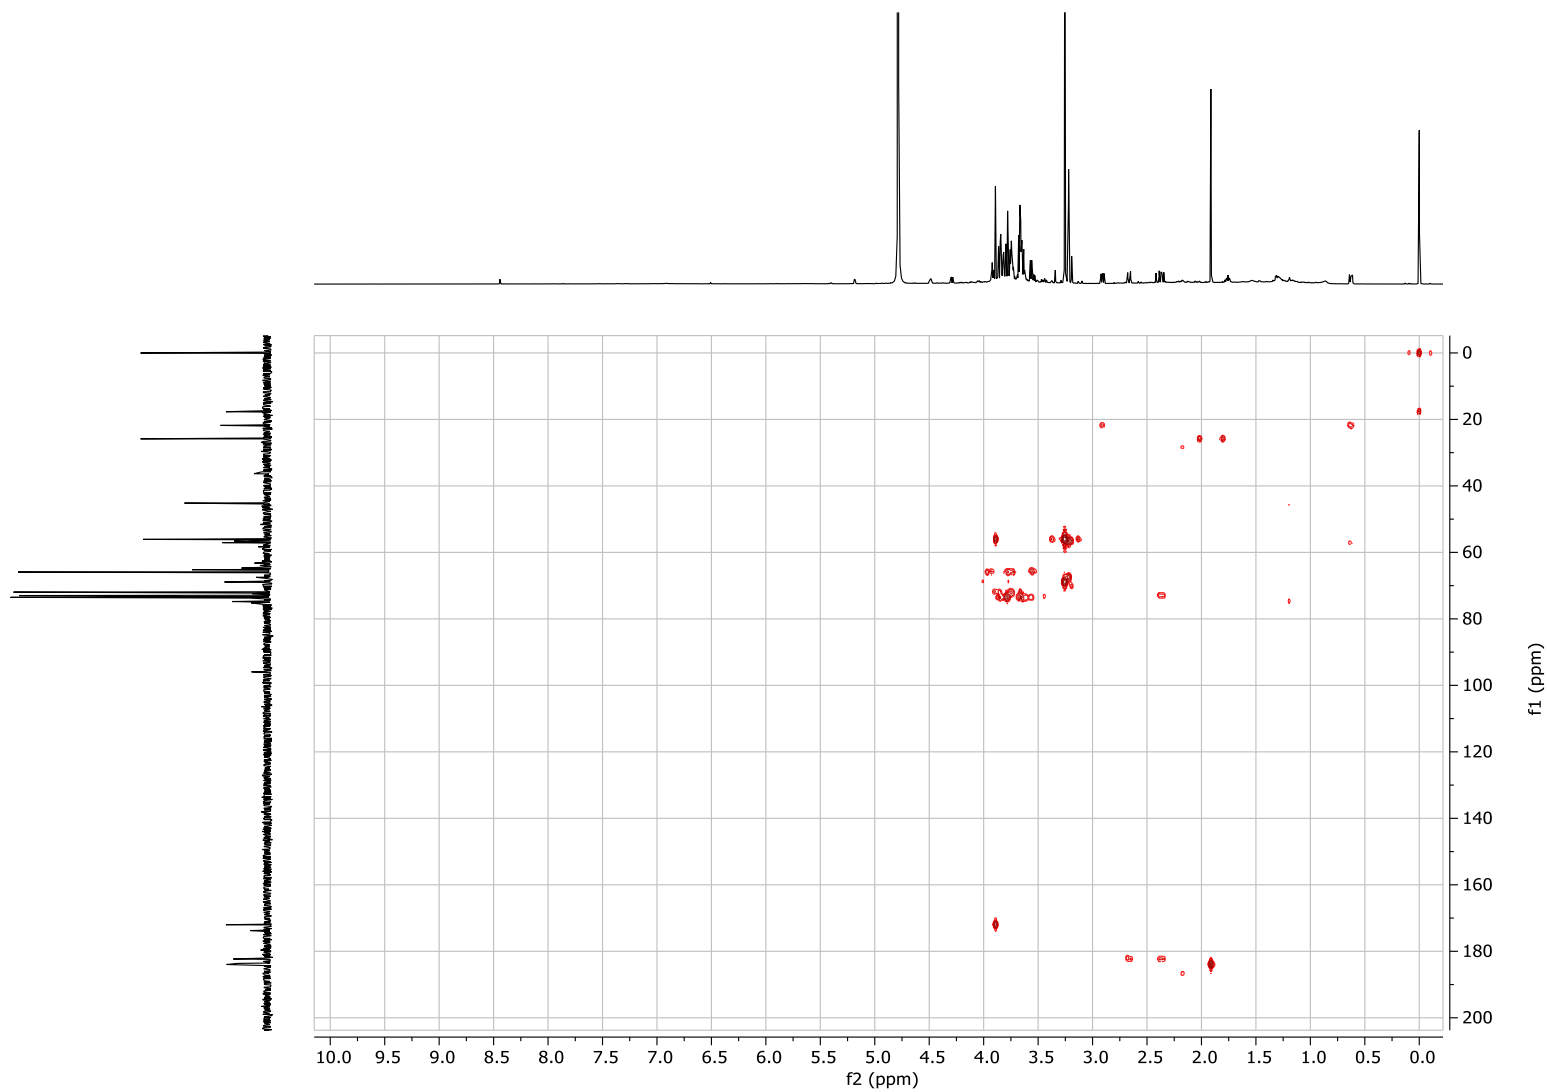

Supplementary Figure 28.  $^1\text{H}$ - $^{13}\text{C}$  HMBC spectrum ( $\text{D}_2\text{O}$ ) of PWBr19

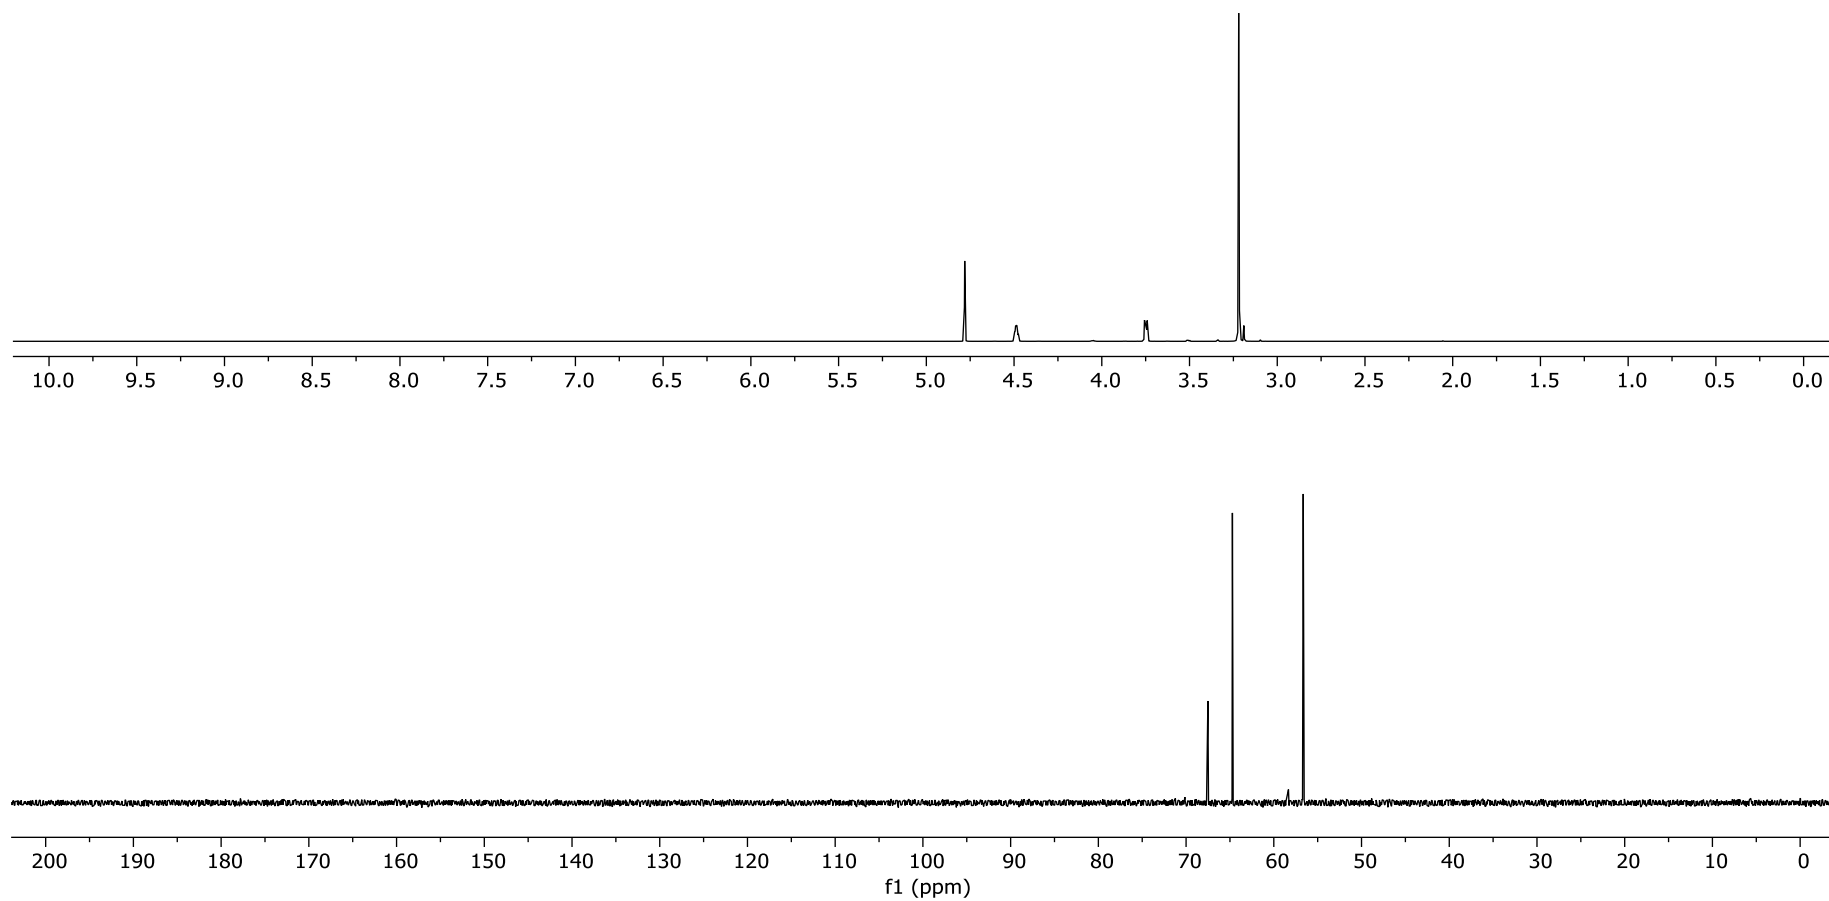

**Supplementary Figure 29.** <sup>1</sup>H (top, 600 MHz) and <sup>13</sup>C (bottom, 150 MHz) NMR spectra (D<sub>2</sub>O) of choline sulfate (CS)

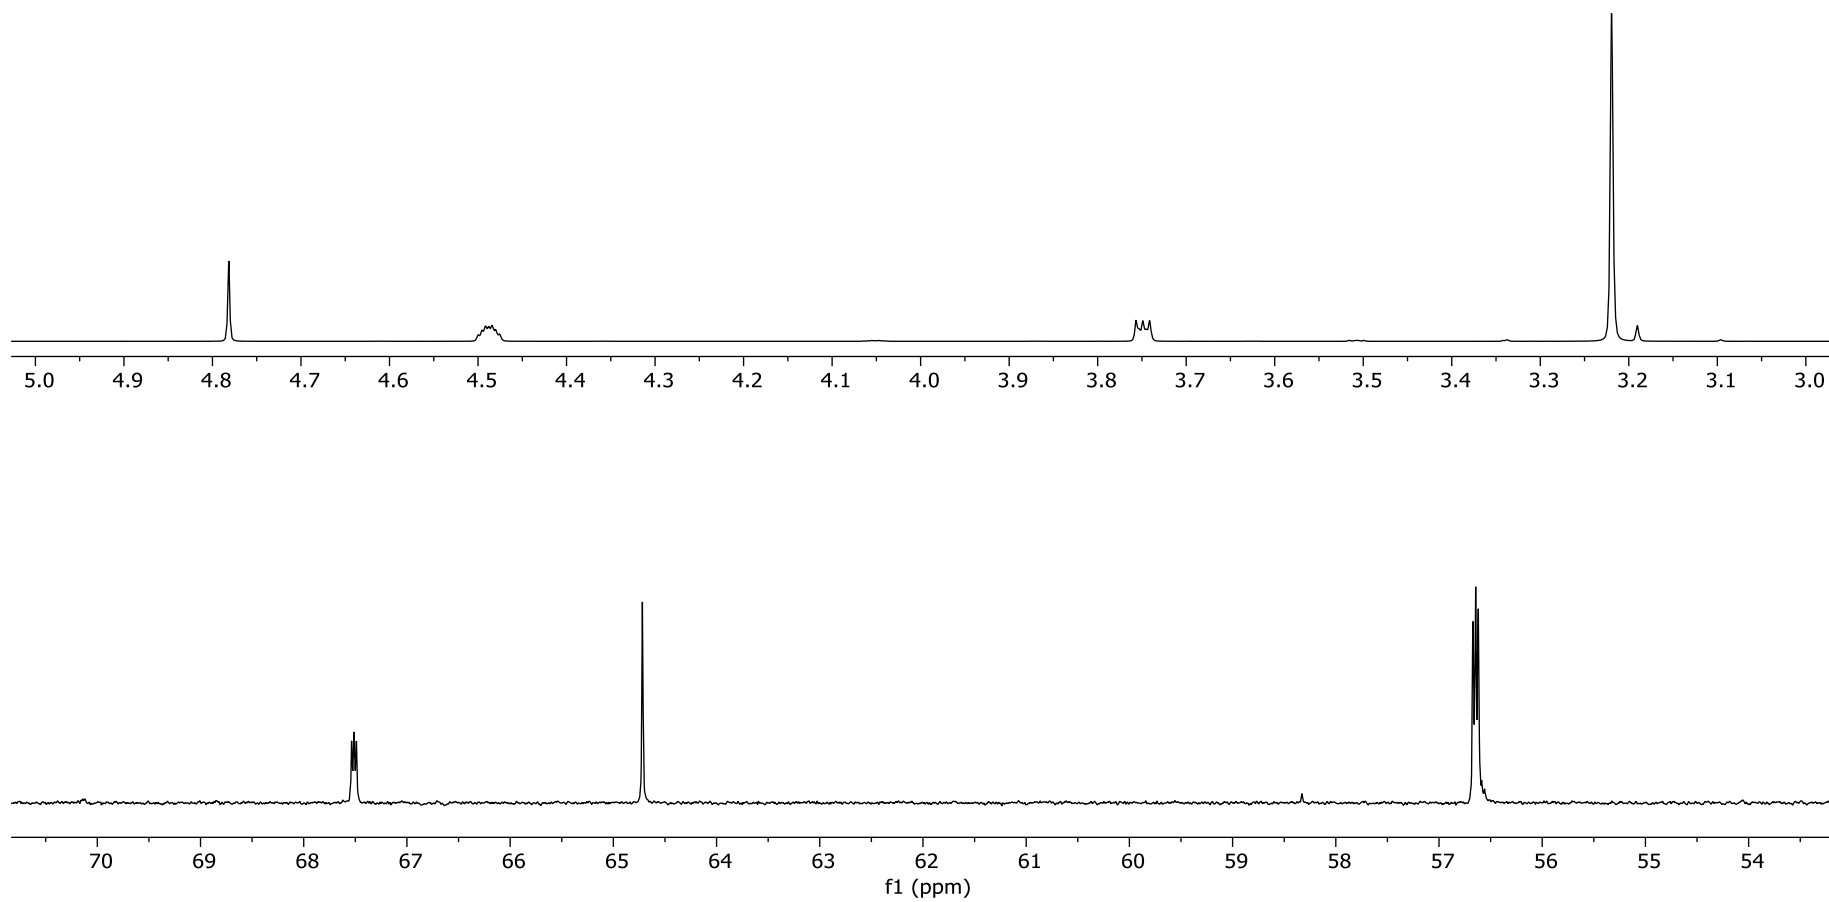

**Supplementary Figure 30.** Expanded <sup>1</sup>H (top, 600 MHz) and <sup>13</sup>C (bottom, 150 MHz) NMR spectra (D<sub>2</sub>O) of choline sulfate (CS)

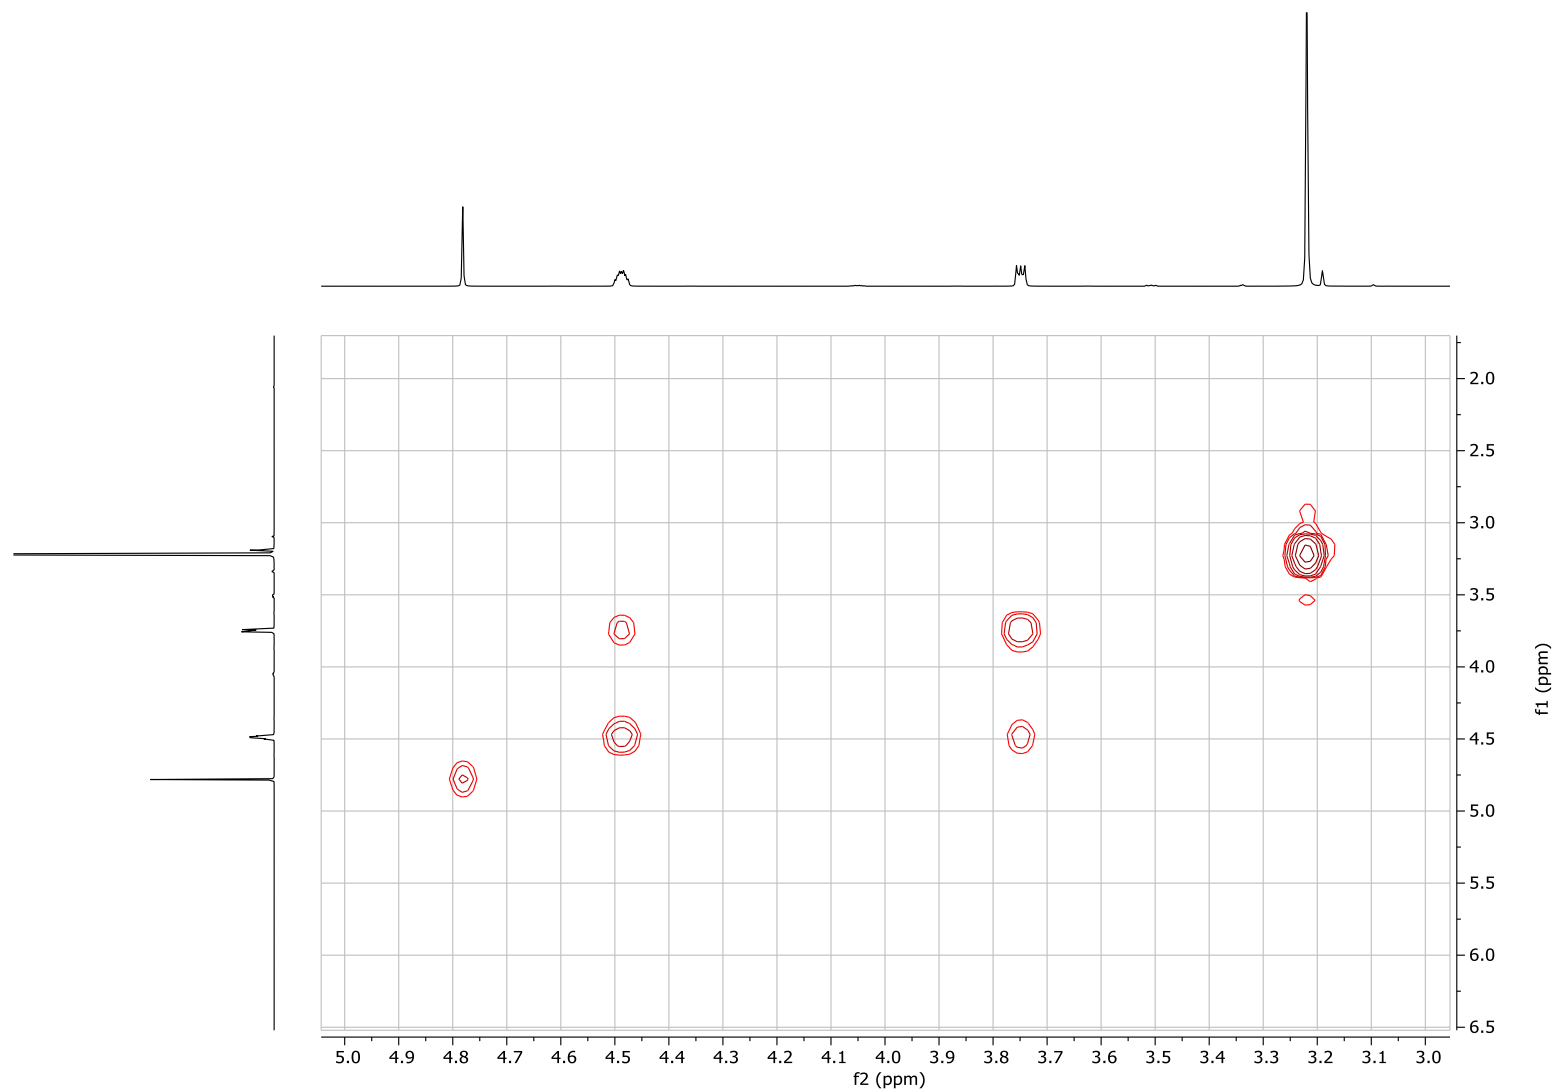

**Supplementary Figure 31.**  $^1\text{H}$ - $^1\text{H}$  COSY spectrum ( $\text{D}_2\text{O}$ ) of choline sulfate (CS)

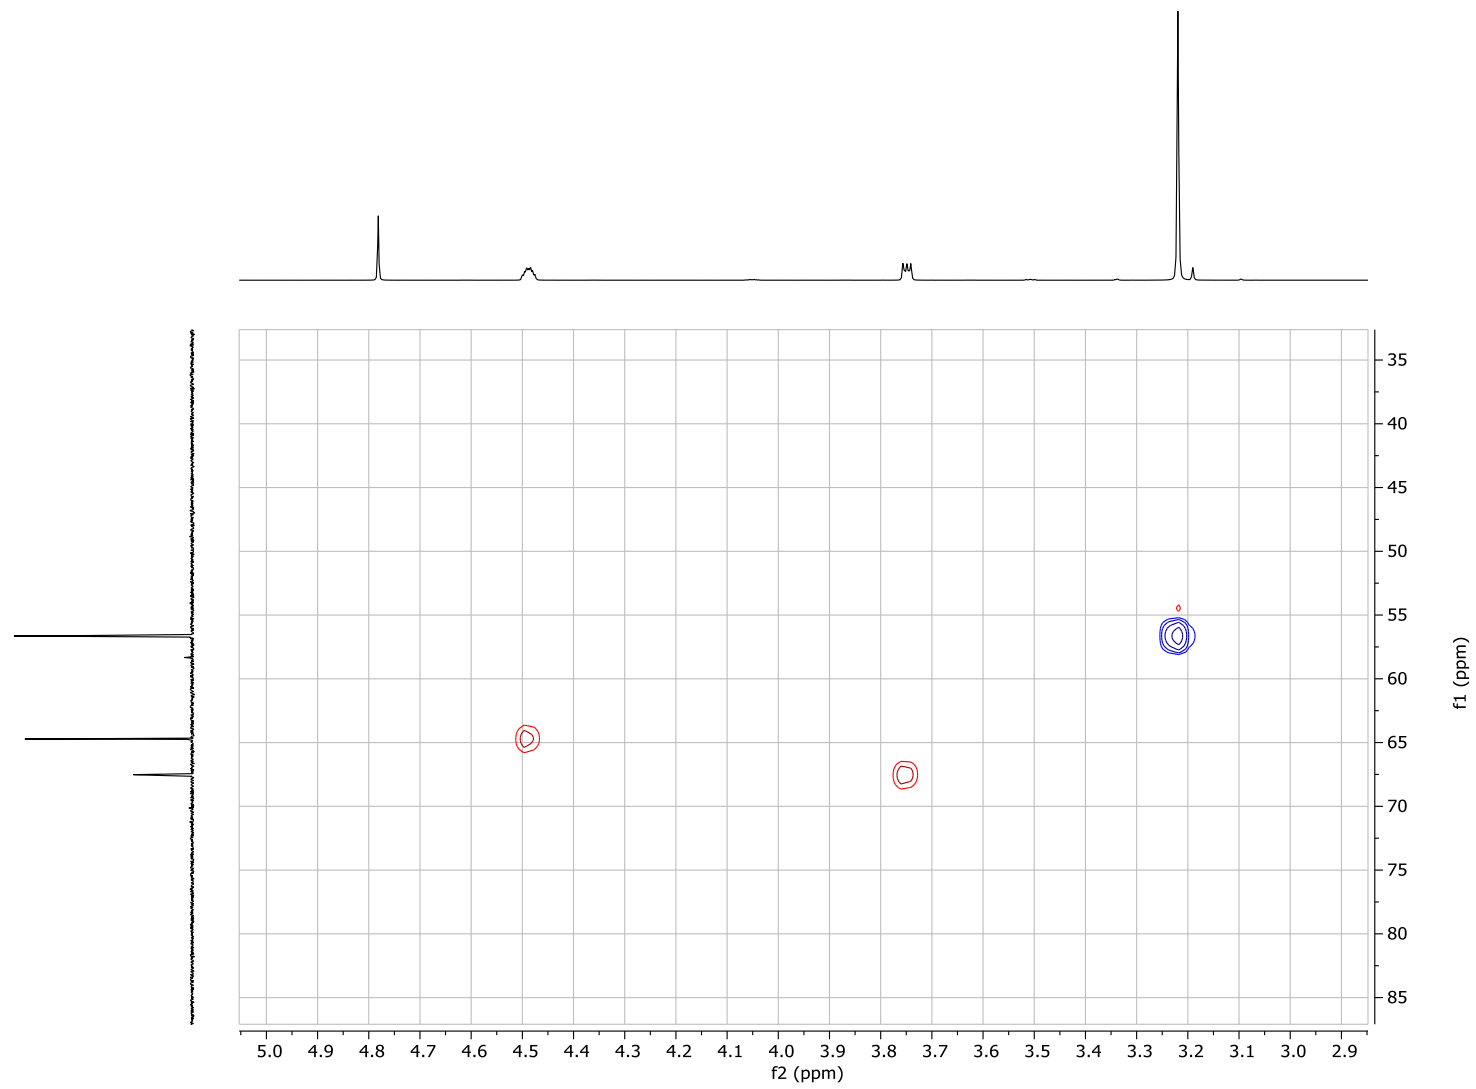

**Supplementary Figure 32.**  $^1\text{H}$ - $^{13}\text{C}$  HSQC spectrum ( $\text{D}_2\text{O}$ ) of choline sulfate (CS)

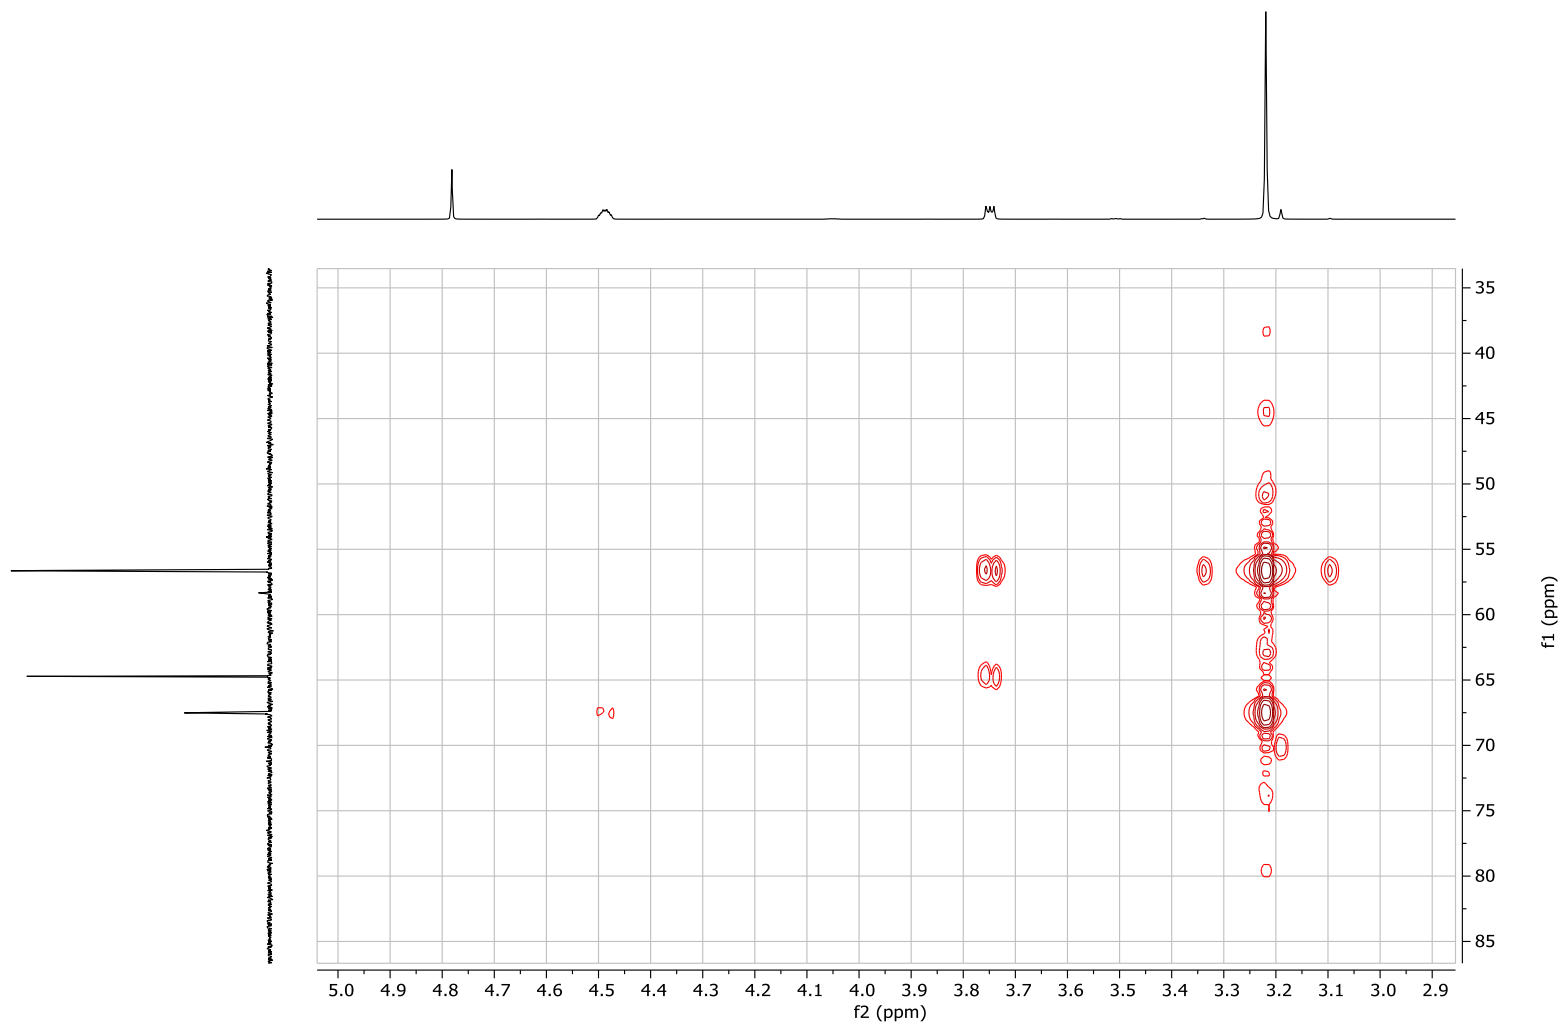

Supplementary Figure 33.  $^1\text{H}$ - $^{13}\text{C}$  HMBC spectrum ( $\text{D}_2\text{O}$ ) of choline sulfate (CS)
